# Supplementary material for: Proscan: a structure-based proline design web server
Source: PubMed Central journal article supplement (PMC11223860; doi:10.1093/nar/gkae408), 2024-05-20
Supplement: gkae408_supplemental_file.pdf [file gkae408_supplemental_file.pdf]

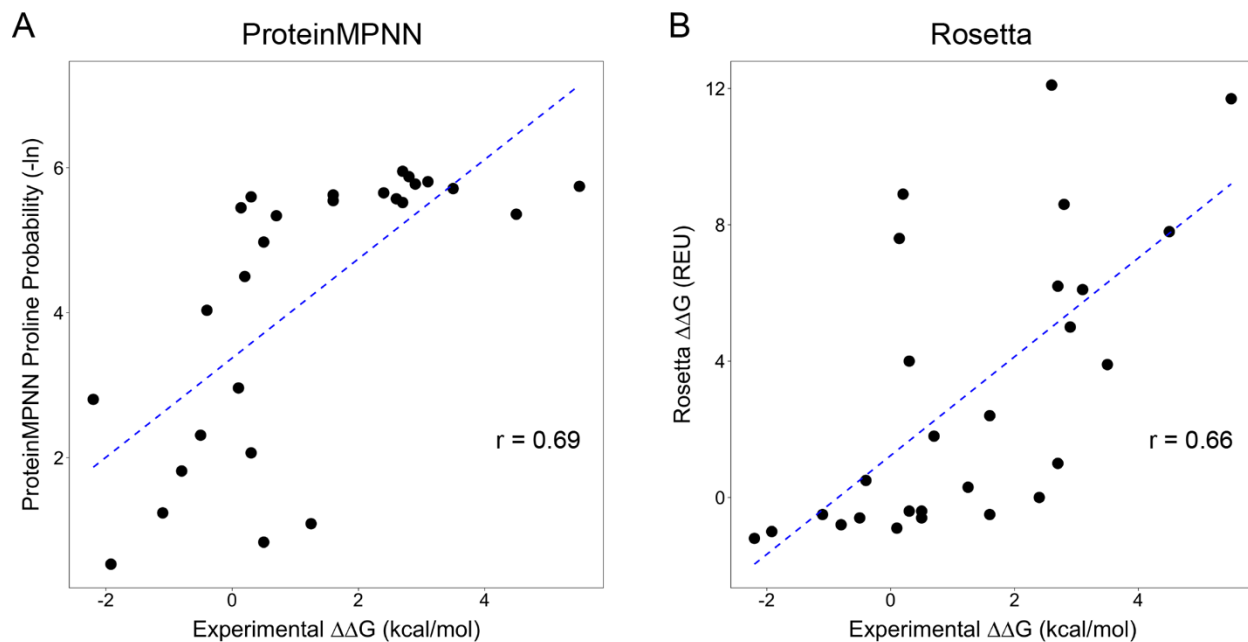

**Supplementary Figure 1.** Stability effect predictions for a set of ProthermDB (2) proline substitutions. (A) ProteinMPNN probability (negative natural log) and (B) Rosetta  $\Delta\Delta G$  values are compared with experimentally measured thermodynamic stability changes ( $\Delta\Delta G$ ) values for a set of 27 proline substitutions from ProthermDB, with linear fits shown as dotted lines, and Pearson correlations noted. Negative natural log (-ln) of ProteinMPNN probability values is used in this context to convert the probabilities to an approximate scale with Gibbs free energy, while Rosetta  $\Delta\Delta G$  values are in Rosetta Energy Units (REU), which are comparable to energy in kcal/mol.

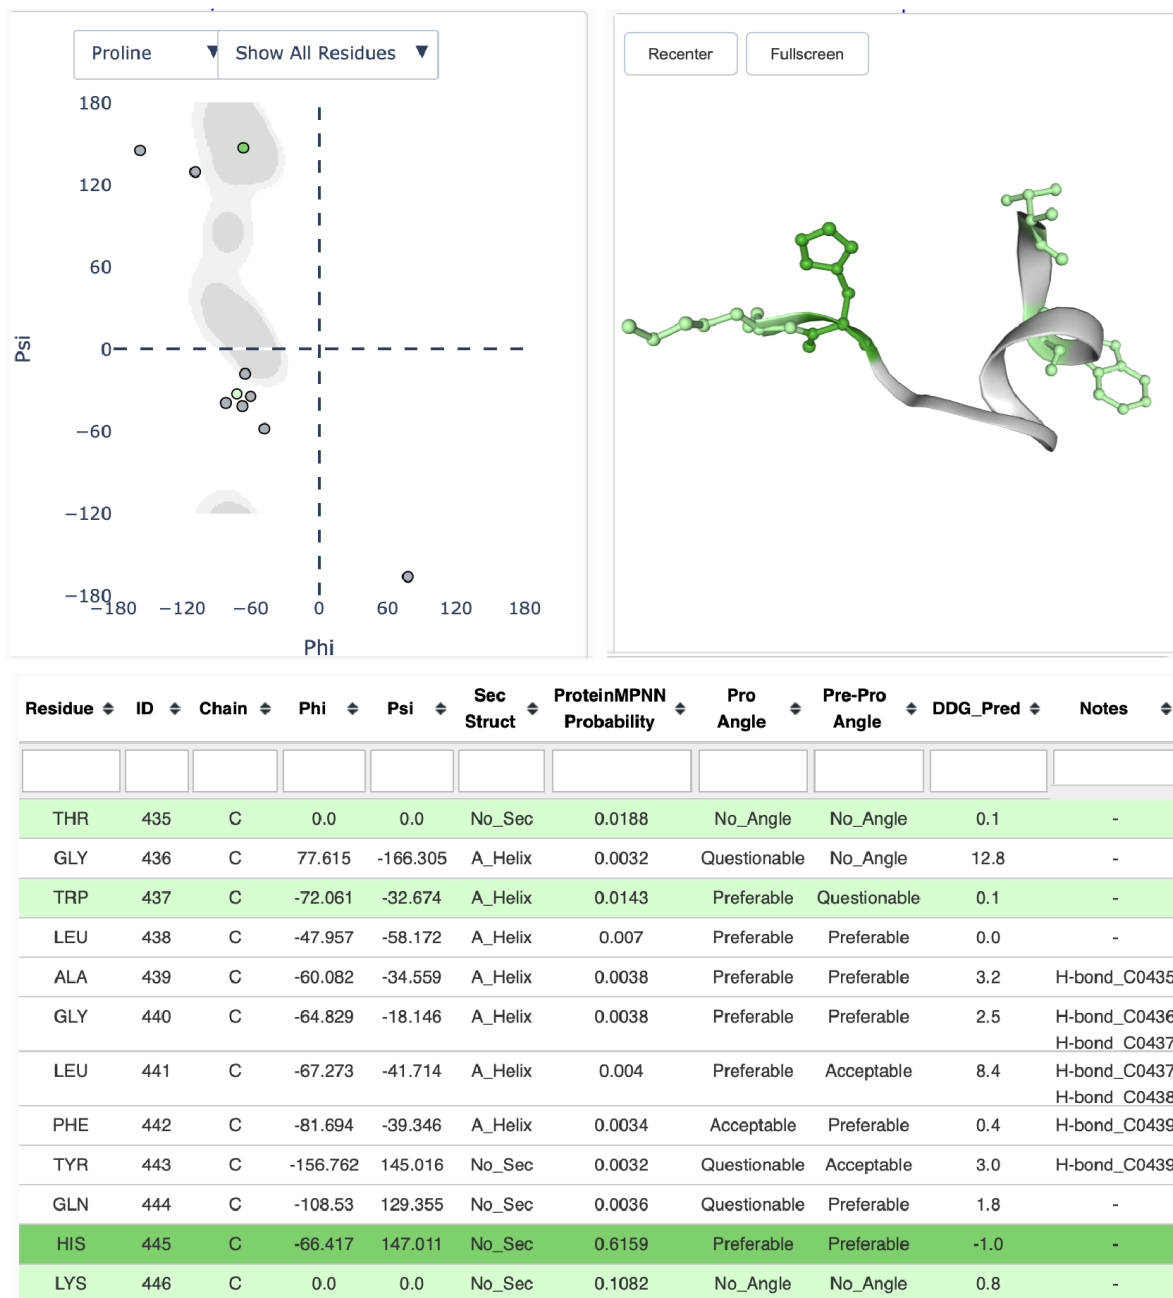

**Supplementary Figure 2.** Proscan results for antigen from HCV antibody-E2 complex (PDB code 4Z0X, chain C). Shown are Ramachandran plot (upper left), antigen structure (upper right) and table of results (bottom), with residues highlighted according to predicted proline substitution favorability (light green = possibly favorable, green = likely favorable).

**Supplementary Table 1.** Proscan values for MegaScale dataset (1) proline substitutions.

| Residue Type | ID | Chain | Phi     | Psi    | Sec Struct     | ProteinMPNN |              | Pre-Pro Angle | Rosetta $\Delta\Delta G$ | MegaScale $\Delta\Delta G$ | PDB  |
|--------------|----|-------|---------|--------|----------------|-------------|--------------|---------------|--------------------------|----------------------------|------|
|              |    |       |         |        |                | Prob        | Pro Angle    |               |                          |                            |      |
| SER          | 23 | A     | -100.89 | 139.94 | Bend           | 0.0045      | Acceptable   | Questionable  | 1.2                      | -0.02                      | 1A32 |
| GLU          | 25 | A     | -63.1   | -44.47 | A_Helix        | 0.0578      | Preferable   | Preferable    | 3.7                      | -0.88                      | 1A32 |
| VAL          | 26 | A     | -67.45  | -38.53 | A_Helix        | 0.0033      | Preferable   | Preferable    | 2.3                      | -0.8                       | 1A32 |
| GLN          | 27 | A     | -66.07  | -42.38 | A_Helix        | 0.0029      | Preferable   | Preferable    | 7.2                      | -0.91                      | 1A32 |
| ILE          | 28 | A     | -65.25  | -38.33 | A_Helix        | 0.0034      | Preferable   | Preferable    | 8.9                      | -1.55                      | 1A32 |
| ALA          | 29 | A     | -71.51  | -42.95 | A_Helix        | 0.0032      | Preferable   | Preferable    | 6.8                      | -1.03                      | 1A32 |
| ILE          | 30 | A     | -61.5   | -43.09 | A_Helix        | 0.0036      | Preferable   | Preferable    | 7.2                      | -1.44                      | 1A32 |
| LEU          | 31 | A     | -63.55  | -46.26 | A_Helix        | 0.0032      | Preferable   | Preferable    | 7.6                      | -1.63                      | 1A32 |
| THR          | 32 | A     | -55.73  | -46.15 | A_Helix        | 0.0048      | Preferable   | Preferable    | 6.6                      | -1.63                      | 1A32 |
| GLU          | 33 | A     | -60.25  | -38.25 | A_Helix        | 0.0039      | Preferable   | Preferable    | 6.7                      | -1.43                      | 1A32 |
| GLN          | 34 | A     | -75.53  | -37.25 | A_Helix        | 0.0033      | Preferable   | Preferable    | 5.7                      | -1.41                      | 1A32 |
| ILE          | 35 | A     | -67.41  | -36.8  | A_Helix        | 0.0037      | Preferable   | Preferable    | 10.2                     | -1.61                      | 1A32 |
| ASN          | 36 | A     | -72.32  | -40.24 | A_Helix        | 0.0037      | Preferable   | Preferable    | 8.4                      | -1.39                      | 1A32 |
| ASN          | 37 | A     | -66.79  | -46.44 | A_Helix        | 0.0038      | Preferable   | Preferable    | 7.4                      | -1.55                      | 1A32 |
| LEU          | 38 | A     | -64.02  | -33.78 | A_Helix        | 0.0044      | Preferable   | Preferable    | 8.6                      | -1.36                      | 1A32 |
| ASN          | 39 | A     | -73.71  | -32.55 | A_Helix        | 0.0040      | Preferable   | Preferable    | 5.7                      | -1.39                      | 1A32 |
| GLU          | 40 | A     | -74.57  | -25.37 | A_Helix        | 0.0041      | Preferable   | Acceptable    | 5.3                      | -1.41                      | 1A32 |
| HIS          | 41 | A     | -74.59  | -46.39 | A_Helix        | 0.0039      | Preferable   | Acceptable    | 9.3                      | -1.47                      | 1A32 |
| LEU          | 42 | A     | -68.2   | -20.33 | A_Helix        | 0.0036      | Preferable   | Preferable    | 6                        | -1.4                       | 1A32 |
| ARG          | 43 | A     | -62.6   | -39.74 | A_Helix        | 0.0033      | Preferable   | Acceptable    | 8                        | -1.16                      | 1A32 |
| VAL          | 44 | A     | -102.98 | 1      | A_Helix        | 0.0040      | Preferable   | Preferable    | 0.4                      | -0.82                      | 1A32 |
| HIS          | 45 | A     | -129.02 | 57.9   | No_Sec         | 0.0023      | Questionable | Questionable  | 7                        | -1.13                      | 1A32 |
| LYS          | 46 | A     | -53.96  | -25.26 | Turn           | 0.8093      | Preferable   | Preferable    | -0.4                     | 0.52                       | 1A32 |
| LYS          | 47 | A     | -77.14  | -13.9  | Turn           | 0.0037      | Preferable   | Acceptable    | 1                        | -0.37                      | 1A32 |
| ASP          | 48 | A     | -53.71  | 152.91 | No_Sec         | 0.0030      | Preferable   | Questionable  | 8.8                      | -0.55                      | 1A32 |
| HIS          | 49 | A     | -140.61 | -32.54 | No_Sec         | 0.0034      | Questionable | Preferable    | 0.7                      | -0.18                      | 1A32 |
| HIS          | 50 | A     | -70.7   | -37.36 | A_Helix        | 0.0040      | Preferable   | Questionable  | 1.5                      | -0.29                      | 1A32 |
| SER          | 51 | A     | -76.55  | -9.33  | A_Helix        | 0.0056      | Preferable   | Preferable    | 6.5                      | -0.87                      | 1A32 |
| ARG          | 52 | A     | -65.14  | -48.72 | A_Helix        | 0.0037      | Preferable   | Questionable  | 4.6                      | -0.7                       | 1A32 |
| ARG          | 53 | A     | -60.95  | -44.92 | A_Helix        | 0.1877      | Preferable   | Preferable    | 1.3                      | -0.9                       | 1A32 |
| GLY          | 54 | A     | -59.47  | -40.99 | A_Helix        | 0.0121      | Preferable   | Preferable    | -1.3                     | -0.53                      | 1A32 |
| LEU          | 55 | A     | -64.68  | -41.17 | A_Helix        | 0.0036      | Preferable   | Preferable    | 5.7                      | -1.63                      | 1A32 |
| LEU          | 56 | A     | -63.79  | -37.97 | A_Helix        | 0.0037      | Preferable   | Preferable    | 3.9                      | -1.3                       | 1A32 |
| LYS          | 57 | A     | -64.93  | -42.59 | A_Helix        | 0.0037      | Preferable   | Preferable    | 5.2                      | -1.26                      | 1A32 |
| MET          | 58 | A     | -66.33  | -39.35 | A_Helix        | 0.0039      | Preferable   | Preferable    | 5.4                      | -1.61                      | 1A32 |
| VAL          | 59 | A     | -63.83  | -42.1  | A_Helix        | 0.0023      | Preferable   | Preferable    | 5.8                      | -1.77                      | 1A32 |
| GLY          | 60 | A     | -67.35  | -42.68 | A_Helix        | 0.0034      | Preferable   | Preferable    | 4.6                      | -1.66                      | 1A32 |
| LYS          | 61 | A     | -63.44  | -30.79 | A_Helix        | 0.0039      | Preferable   | Preferable    | 7.2                      | -1.92                      | 1A32 |
| ARG          | 62 | A     | -76.7   | -33.08 | A_Helix        | 0.0045      | Preferable   | Preferable    | 7.8                      | -1.78                      | 1A32 |
| ARG          | 63 | A     | -64.16  | -41.05 | A_Helix        | 0.0039      | Preferable   | Acceptable    | 6.3                      | -2.2                       | 1A32 |
| ARG          | 64 | A     | -63.56  | -49.73 | A_Helix        | 0.0036      | Preferable   | Preferable    | 7                        | -2.25                      | 1A32 |
| LEU          | 65 | A     | -62.36  | -41.04 | A_Helix        | 0.0035      | Preferable   | Preferable    | 5                        | -3.2                       | 1A32 |
| LEU          | 66 | A     | -64.32  | -41.47 | A_Helix        | 0.0038      | Preferable   | Preferable    | 9.5                      | -2.16                      | 1A32 |
| ALA          | 67 | A     | -65.36  | -34.49 | A_Helix        | 0.0044      | Preferable   | Preferable    | 7.9                      | 0.83                       | 1A32 |
| TYR          | 68 | A     | -65.11  | -51.2  | A_Helix        | 0.0036      | Preferable   | Preferable    | 7.9                      | -2.18                      | 1A32 |
| LEU          | 69 | A     | -62.86  | -39.26 | A_Helix        | 0.0039      | Preferable   | Preferable    | 6.2                      | -2.54                      | 1A32 |
| ARG          | 70 | A     | -57.3   | -44.27 | A_Helix        | 0.0034      | Preferable   | Preferable    | 7.3                      | -1.95                      | 1A32 |
| ASN          | 71 | A     | -74.85  | -37.59 | A_Helix        | 0.0040      | Preferable   | Preferable    | 2.9                      | -1.53                      | 1A32 |
| LYS          | 72 | A     | -71.73  | -44.27 | A_Helix        | 0.0038      | Preferable   | Preferable    | 6.1                      | -1.35                      | 1A32 |
| ASP          | 73 | A     | -158.87 | 105.75 | No_Sec         | 0.0036      | Questionable | Preferable    | 5.9                      | -1.68                      | 1A32 |
| VAL          | 74 | A     | -62.67  | -31.26 | A_Helix        | 0.1819      | Preferable   | Acceptable    | -0.5                     | 0.97                       | 1A32 |
| ALA          | 75 | A     | -64.64  | -53.99 | A_Helix        | 0.0070      | Preferable   | Preferable    | 0.5                      | -0.38                      | 1A32 |
| ARG          | 76 | A     | -63.36  | -33.69 | A_Helix        | 0.0034      | Preferable   | Preferable    | 8.6                      | -1.48                      | 1A32 |
| TYR          | 77 | A     | -63.51  | -50.66 | A_Helix        | 0.0044      | Preferable   | Preferable    | 10.8                     | -1.29                      | 1A32 |
| ARG          | 78 | A     | -73.65  | -28.65 | A_Helix        | 0.0042      | Preferable   | Preferable    | 5.8                      | -0.99                      | 1A32 |
| GLU          | 79 | A     | -65.5   | -44.16 | A_Helix        | 0.0034      | Preferable   | Acceptable    | 7.6                      | -1.6                       | 1A32 |
| ILE          | 80 | A     | -73.02  | -35.83 | A_Helix        | 0.0038      | Preferable   | Preferable    | 4.4                      | -1.69                      | 1A32 |
| VAL          | 81 | A     | -66.19  | -35.45 | A_Helix        | 0.0039      | Preferable   | Preferable    | 4.5                      | -1.46                      | 1A32 |
| GLU          | 82 | A     | -71.35  | -42.81 | A_Helix        | 0.0042      | Preferable   | Preferable    | 8.8                      | -1.21                      | 1A32 |
| LYS          | 83 | A     | -69.08  | -30.69 | A_Helix        | 0.0035      | Preferable   | Preferable    | 5.1                      | -1.23                      | 1A32 |
| LEU          | 84 | A     | -91.15  | -7.22  | A_Helix        | 0.0043      | Preferable   | Preferable    | 5.7                      | -1.21                      | 1A32 |
| GLY          | 85 | A     | 69.52   | 37.15  | Turn           | 0.0039      | Questionable | Questionable  | 2.7                      | -0.4                       | 1A32 |
| SER          | 10 | A     | -83.6   | 8.82   | No_Sec         | 0.0040      | Preferable   | Questionable  | 0.7                      | 0.32                       | 1F0M |
| PHE          | 11 | A     | -123.41 | 114.83 | No_Sec         | 0.0246      | Questionable | Questionable  | 3.8                      | -0.59                      | 1F0M |
| ASN          | 12 | A     | -70.09  | -14.84 | Bend           | 0.1362      | Preferable   | Preferable    | 3.9                      | -0.43                      | 1F0M |
| THR          | 13 | A     | -136.52 | 159.8  | Bend           | 0.0041      | Questionable | Questionable  | 7.4                      | -0.96                      | 1F0M |
| VAL          | 14 | A     | -61.12  | -42.88 | A_Helix        | 0.0053      | Preferable   | Preferable    | 0.6                      | -1.84                      | 1F0M |
| ASP          | 15 | A     | -57.13  | -39.25 | A_Helix        | 0.0345      | Preferable   | Preferable    | -0.6                     | -0.23                      | 1F0M |
| GLU          | 16 | A     | -62.79  | -51.03 | A_Helix        | 0.0046      | Preferable   | Preferable    | 7                        | -2.44                      | 1F0M |
| TRP          | 17 | A     | -55.37  | -48.15 | A_Helix        | 0.0037      | Preferable   | Preferable    | 9.6                      | -3.67                      | 1F0M |
| LEU          | 18 | A     | -59.76  | -36.37 | A_Helix        | 0.0043      | Preferable   | Preferable    | 8.1                      | -3.89                      | 1F0M |
| GLU          | 19 | A     | -67.28  | -45.55 | A_Helix        | 0.0042      | Preferable   | Preferable    | 10                       | -3.27                      | 1F0M |
| ALA          | 20 | A     | -56.89  | -39.71 | A_Helix        | 0.0038      | Preferable   | Preferable    | 10.3                     | -3.88                      | 1F0M |
| ILE          | 21 | A     | -92.01  | 21.03  | Turn           | 0.0036      | Preferable   | Preferable    | 4.7                      | -3.65                      | 1F0M |
| LYS          | 22 | A     | 57.24   | 24.81  | Turn           | 0.0040      | Questionable | Questionable  | 2.6                      | -3.01                      | 1F0M |
| MET          | 23 | A     | -108.26 | 21.16  | No_Sec         | 0.0037      | Acceptable   | Questionable  | 12.5                     | -3.3                       | 1F0M |
| GLY          | 24 | A     | -49.51  | -29.99 | 3-<br>10_Helix | 0.0029      | Preferable   | Questionable  | 3.9                      | -0.38                      | 1F0M |
| GLN          | 25 | A     | -54.15  | -14.79 | 3-<br>10_Helix | 0.0036      | Preferable   | Preferable    | 1.6                      | -1.31                      | 1F0M |
| TYR          | 26 | A     | -100.66 | -9.41  | 3-<br>10_Helix | 0.0031      | Preferable   | Questionable  | 8.3                      | -2.98                      | 1F0M |
| LYS          | 27 | A     | -44.37  | -48.44 | A_Helix        | 0.0046      | Preferable   | Questionable  | 5.8                      | -3.26                      | 1F0M |
| GLU          | 28 | A     | -53.24  | -47.22 | A_Helix        | 0.1168      | Preferable   | Preferable    | 0.3                      | -0.82                      | 1F0M |
| SER          | 29 | A     | -64.49  | -49.41 | A_Helix        | 0.0035      | Preferable   | Preferable    | 1.9                      | -0.49                      | 1F0M |

|     |    |   |         |        |                     |        |              |              |      |       |      |
|-----|----|---|---------|--------|---------------------|--------|--------------|--------------|------|-------|------|
| PHE | 30 | A | -58.4   | -51.68 | A_Helix             | 0.0037 | Preferable   | Preferable   | 9.2  | -3.68 | 1FOM |
| ALA | 31 | A | -54.83  | -57.61 | A_Helix             | 0.0040 | Preferable   | Preferable   | 6.3  | -3.52 | 1FOM |
| ASN | 32 | A | -59.65  | -1.13  | Turn                | 0.0043 | Preferable   | Preferable   | 4.6  | -2.79 | 1FOM |
| ALA | 33 | A | -115.73 | 4.27   | Turn                | 0.0038 | Questionable | Questionable | 2.7  | -3.21 | 1FOM |
| GLY | 34 | A | 87.67   | 0.83   | Turn                | 0.0037 | Questionable | Questionable | 7.3  | -3.26 | 1FOM |
| PHE | 35 | A | -89.63  | 74.35  | No_Sec              | 0.0035 | Preferable   | Questionable | 2.9  | -3.53 | 1FOM |
| THR | 36 | A | -106.2  | 4.46   | No_Sec              | 0.0048 | Acceptable   | Questionable | 7.4  | -2.81 | 1FOM |
| SER | 37 | A | -141.74 | 168.76 | Bend                | 0.0040 | Questionable | Questionable | 1    | -3.31 | 1FOM |
| PHE | 38 | A | -78.8   | -23.1  | A_Helix             | 0.0038 | Preferable   | Preferable   | 2.6  | -1.88 | 1FOM |
| ASP | 39 | A | -56.46  | -56.42 | A_Helix             | 0.0064 | Preferable   | Acceptable   | 2.2  | -0.39 | 1FOM |
| VAL | 40 | A | -72.53  | -44.69 | A_Helix             | 0.0031 | Preferable   | Preferable   | 2.1  | -1.85 | 1FOM |
| VAL | 41 | A | -51.41  | -44.75 | A_Helix             | 0.0039 | Preferable   | Preferable   | 7.1  | -3.81 | 1FOM |
| SER | 42 | A | -64.53  | -11.7  | Turn                | 0.0037 | Preferable   | Preferable   | 7.1  | -1.53 | 1FOM |
| GLN | 43 | A | -100.7  | -4.23  | Turn                | 0.0033 | Preferable   | Questionable | 4.3  | -1.91 | 1FOM |
| MET | 44 | A | -61.9   | 140.79 | No_Sec              | 0.0036 | Preferable   | Questionable | 12.4 | -3.96 | 1FOM |
| MET | 45 | A | -115.84 | 174.47 | No_Sec              | 0.0041 | Questionable | Preferable   | 5.1  | -2.39 | 1FOM |
| MET | 46 | A | -49.19  | -46.09 | A_Helix             | 0.0150 | Preferable   | Preferable   | 1.5  | -0.18 | 1FOM |
| GLU | 47 | A | -48.47  | -51.66 | A_Helix             | 0.0106 | Preferable   | Preferable   | 0.8  | -0.17 | 1FOM |
| ASP | 48 | A | -59.81  | -41.53 | A_Helix             | 0.0029 | Preferable   | Preferable   | 1.6  | -2.79 | 1FOM |
| ILE | 49 | A | -63.63  | -39.01 | A_Helix             | 0.0044 | Preferable   | Preferable   | 6.6  | -3.53 | 1FOM |
| LEU | 50 | A | -67.13  | -43.24 | A_Helix             | 0.0040 | Preferable   | Preferable   | 6.3  | -2.58 | 1FOM |
| ARG | 51 | A | -62.8   | -42.94 | A_Helix             | 0.0040 | Preferable   | Preferable   | 7.7  | -3.12 | 1FOM |
| VAL | 52 | A | -65.2   | -7.07  | Turn                | 0.0033 | Preferable   | Preferable   | 5.3  | -3.84 | 1FOM |
| GLY | 53 | A | 94.18   | 18.49  | Turn                | 0.0033 | Questionable | Questionable | 8.1  | -1.02 | 1FOM |
| VAL | 54 | A | -79.08  | 110.92 | No_Sec              | 0.0039 | Preferable   | Questionable | 7.8  | -3.53 | 1FOM |
| THR | 55 | A | -105.16 | -14.74 | No_Sec              | 0.0036 | Acceptable   | Preferable   | 2.9  | -1.57 | 1FOM |
| LEU | 56 | A | -81.33  | 128.39 | No_Sec              | 0.0042 | Preferable   | Questionable | -0.3 | -0.73 | 1FOM |
| ALA | 57 | A | -51.87  | -48.85 | A_Helix             | 0.1749 | Preferable   | Preferable   | -0.8 | 0.51  | 1FOM |
| GLY | 58 | A | -61.61  | -36.04 | A_Helix             | 0.0066 | Preferable   | Preferable   | -1.3 | 0.14  | 1FOM |
| HIS | 59 | A | -69.41  | -44.4  | A_Helix             | 0.0032 | Preferable   | Preferable   | 1.5  | -2.13 | 1FOM |
| GLN | 60 | A | -55.11  | -46.02 | A_Helix             | 0.0036 | Preferable   | Preferable   | 6.8  | -2.18 | 1FOM |
| LYS | 61 | A | -64.78  | -58.66 | A_Helix             | 0.0042 | Preferable   | Preferable   | 5.2  | -3.12 | 1FOM |
| LYS | 62 | A | -47.87  | -47.57 | A_Helix             | 0.0032 | Preferable   | Preferable   | 6.5  | -2.28 | 1FOM |
| ILE | 63 | A | -65.75  | -51.97 | A_Helix             | 0.0041 | Preferable   | Preferable   | 10.1 | -4.55 | 1FOM |
| LEU | 64 | A | -56.27  | -46.02 | A_Helix             | 0.0037 | Preferable   | Preferable   | 8.8  | -4.28 | 1FOM |
| ASN | 65 | A | -65.43  | -32.36 | A_Helix             | 0.0037 | Preferable   | Preferable   | 7.7  | -3.55 | 1FOM |
| SER | 66 | A | -69.76  | -45.15 | A_Helix             | 0.0032 | Preferable   | Preferable   | 7.4  | -3.68 | 1FOM |
| ILE | 67 | A | -57.29  | -44.43 | A_Helix             | 0.0041 | Preferable   | Preferable   | 9.8  | -4.06 | 1FOM |
| GLN | 68 | A | -61.48  | -35.35 | A_Helix             | 0.0040 | Preferable   | Preferable   | 7.4  | -2.29 | 1FOM |
| VAL | 69 | A | -70.8   | -41.04 | A_Helix             | 0.0036 | Preferable   | Preferable   | 4.2  | -1.9  | 1FOM |
| MET | 70 | A | -59.25  | -54    | A_Helix             | 0.0039 | Preferable   | Preferable   | 10.8 | -3.04 | 1FOM |
| ARG | 71 | A | -60.5   | -44.32 | A_Helix             | 0.0045 | Preferable   | Preferable   | 8.7  | -2    | 1FOM |
| ALA | 72 | A | -65.69  | -35.93 | A_Helix             | 0.0043 | Preferable   | Preferable   | 4.8  | -1.15 | 1FOM |
| GLN | 73 | A | -69.17  | -44.93 | A_Helix             | 0.0042 | Preferable   | Preferable   | 9    | -0.98 | 1FOM |
| MET | 74 | A | -56.91  | -41.94 | A_Helix             | 0.0037 | Preferable   | Preferable   | 7.2  | -1.07 | 1FOM |
| ASN | 75 | A | -61.7   | -25.42 | A_Helix             | 0.0043 | Preferable   | Preferable   | 7.5  | -0.52 | 1FOM |
| LYS | 4  | A | 0       | 0      | No_Sec              | 0.0727 | No_Angle     | No_Angle     | 0.3  | 0.14  | 1LP1 |
| PHE | 5  | A | -58.74  | 9.45   | A_Helix             | 0.0746 | Questionable | No_Angle     | 5.4  | -0.26 | 1LP1 |
| ASN | 6  | A | -65.61  | -52.47 | A_Helix             | 0.0058 | Preferable   | Questionable | 8.2  | 0.07  | 1LP1 |
| LYS | 7  | A | -68.93  | -35.83 | A_Helix             | 0.0078 | Preferable   | Preferable   | 1.3  | 0.1   | 1LP1 |
| GLU | 8  | A | -54.81  | -53.23 | A_Helix             | 0.0030 | Preferable   | Preferable   | 2.7  | -0.06 | 1LP1 |
| LEU | 9  | A | -63.59  | -37.37 | A_Helix             | 0.0042 | Preferable   | Preferable   | 7.6  | -0.87 | 1LP1 |
| SER | 10 | A | -67.02  | -49.98 | A_Helix             | 0.0039 | Preferable   | Preferable   | 4.6  | -0.54 | 1LP1 |
| VAL | 11 | A | -71.44  | -41.96 | A_Helix             | 0.0039 | Preferable   | Preferable   | 7.1  | 0.03  | 1LP1 |
| ALA | 12 | A | -64.1   | -46.52 | A_Helix             | 0.0035 | Preferable   | Preferable   | 9.8  | -1.34 | 1LP1 |
| GLY | 13 | A | -55.94  | -53.37 | A_Helix             | 0.0039 | Preferable   | Preferable   | 11.3 | -1.71 | 1LP1 |
| ARG | 14 | A | -60.26  | -42.26 | A_Helix             | 0.0036 | Preferable   | Preferable   | 7.6  | -1.42 | 1LP1 |
| GLU | 15 | A | -61.2   | -44.55 | A_Helix             | 0.0034 | Preferable   | Preferable   | 7.2  | -1.77 | 1LP1 |
| ILE | 16 | A | -62.08  | -48.31 | A_Helix             | 0.0024 | Preferable   | Preferable   | 8.8  | -1.7  | 1LP1 |
| VAL | 17 | A | -65.48  | -23.72 | A_Helix             | 0.0046 | Preferable   | Preferable   | 5.1  | -1.47 | 1LP1 |
| THR | 18 | A | -89.97  | -1.63  | Turn                | 0.0046 | Preferable   | Acceptable   | 4.5  | -1.91 | 1LP1 |
| LEU | 19 | A | -65.27  | 122.87 | No_Sec              | 0.0044 | Preferable   | Questionable | 6.5  | -1.64 | 1LP1 |
| ASN | 21 | A | -94.46  | -0.7   | Turn                | 0.0041 | Preferable   | Acceptable   | 5.2  | -2.12 | 1LP1 |
| LEU | 22 | A | -89.32  | 141.13 | Bend                | 0.0040 | Preferable   | Questionable | 1.7  | -1.67 | 1LP1 |
| ASN | 23 | A | -86.73  | 168.39 | No_Sec              | 0.0366 | Preferable   | Preferable   | 4.3  | -1.23 | 1LP1 |
| ASP | 24 | A | -53.11  | -56.61 | A_Helix             | 0.1040 | Preferable   | Preferable   | 0.3  | -0.04 | 1LP1 |
| GLN | 26 | A | -67.85  | -43.51 | A_Helix             | 0.0047 | Preferable   | Preferable   | 11   | -1.77 | 1LP1 |
| LYS | 27 | A | -60.78  | -50.2  | A_Helix             | 0.0038 | Preferable   | Preferable   | 7    | -1.88 | 1LP1 |
| LYS | 28 | A | -57.27  | -38.99 | A_Helix             | 0.0029 | Preferable   | Preferable   | 7.1  | -1.22 | 1LP1 |
| ALA | 29 | A | -63.17  | -49.2  | A_Helix             | 0.0037 | Preferable   | Preferable   | 8.2  | -1.22 | 1LP1 |
| PHE | 30 | A | -59.9   | -46.57 | A_Helix             | 0.0036 | Preferable   | Preferable   | 8    | -2.21 | 1LP1 |
| ILE | 31 | A | -59.2   | -44.43 | A_Helix             | 0.0037 | Preferable   | Preferable   | 9.1  | -1.77 | 1LP1 |
| PHE | 32 | A | -62.76  | -43.76 | A_Helix             | 0.0073 | Preferable   | Preferable   | 9.7  | -1.7  | 1LP1 |
| SER | 33 | A | -63.02  | -43.23 | A_Helix             | 0.0036 | Preferable   | Preferable   | 6    | -1.88 | 1LP1 |
| LEU | 34 | A | -53.41  | -45.55 | A_Helix             | 0.0040 | Preferable   | Preferable   | 11.1 | -2.02 | 1LP1 |
| TRP | 35 | A | -65.07  | -45.69 | A_Helix             | 0.0038 | Preferable   | Preferable   | 8.8  | -1.48 | 1LP1 |
| ASP | 36 | A | -59.3   | -30.23 | A_Helix             | 0.0040 | Preferable   | Preferable   | 6.4  | -2.09 | 1LP1 |
| ASP | 37 | A | -145.94 | 77.21  | No_Sec              | 0.0045 | Questionable | Preferable   | 3.1  | -1.45 | 1LP1 |
| SER | 39 | A | -54.11  | -49.98 | 3-                  | 0.0044 | Preferable   | Acceptable   | 4    | -0.94 | 1LP1 |
| GLN | 40 | A | -98.74  | 34.06  | 10_Helix<br>3-      | 0.0033 | Acceptable   | Preferable   | 5.6  | -1.31 | 1LP1 |
| SER | 41 | A | -55.84  | -44.28 | 10_Helix<br>A_Helix | 0.0035 | Preferable   | Questionable | 2.7  | -1.48 | 1LP1 |
| ALA | 42 | A | -58.02  | -37.74 | A_Helix             | 0.0463 | Preferable   | Preferable   | -0.3 | -0.79 | 1LP1 |
| ASN | 43 | A | -70.81  | -44.36 | A_Helix             | 0.0034 | Preferable   | Preferable   | 2.5  | -0.92 | 1LP1 |
| LEU | 44 | A | -59.59  | -47.7  | A_Helix             | 0.0039 | Preferable   | Preferable   | 6.3  | -1.6  | 1LP1 |
| LEU | 45 | A | -57.74  | -49.78 | A_Helix             | 0.0036 | Preferable   | Preferable   | 6.4  | -1.73 | 1LP1 |
| ALA | 46 | A | -58.25  | -48.4  | A_Helix             | 0.0043 | Preferable   | Preferable   | 2.8  | -1.9  | 1LP1 |
| GLU | 47 | A | -58.81  | -41.59 | A_Helix             | 0.0031 | Preferable   | Preferable   | 7.7  | -2.7  | 1LP1 |
| ALA | 48 | A | -65.93  | -36.75 | A_Helix             | 0.0036 | Preferable   | Preferable   | 8.1  | -1.69 | 1LP1 |

|     |    |   |         |        |                |        |              |              |      |       |      |
|-----|----|---|---------|--------|----------------|--------|--------------|--------------|------|-------|------|
| LYS | 49 | A | -68.19  | -44.48 | A_Helix        | 0.0025 | Preferable   | Preferable   | 9.2  | -1.8  | 1LP1 |
| LYS | 50 | A | -54.62  | -47.95 | A_Helix        | 0.0041 | Preferable   | Preferable   | 7.3  | -1.7  | 1LP1 |
| LEU | 51 | A | -65.7   | -31.75 | A_Helix        | 0.0035 | Preferable   | Preferable   | 4.9  | -1.73 | 1LP1 |
| ASN | 52 | A | -65.1   | -31.66 | A_Helix        | 0.0032 | Preferable   | Preferable   | 11.1 | -1.91 | 1LP1 |
| ASP | 53 | A | -77.43  | -40.47 | A_Helix        | 0.0042 | Preferable   | Preferable   | 7.5  | -1.66 | 1LP1 |
| ALA | 54 | A | -62.59  | -35.07 | A_Helix        | 0.0045 | Preferable   | Preferable   | 4.8  | -1.55 | 1LP1 |
| GLN | 55 | A | -93.39  | 10.46  | Turn           | 0.0037 | Preferable   | Preferable   | 6.3  | -1.5  | 1LP1 |
| ALA | 56 | A | -67.77  | 157.02 | Bend           | 0.0037 | Preferable   | Questionable | 6.7  | -0.82 | 1LP1 |
| LYS | 58 | A | 0       | 0      | No_Sec         | 0.0416 | No_Angle     | No_Angle     | 0    | 0.09  | 1LP1 |
| SER | 2  | A | 0       | 0      | No_Sec         | 0.0256 | No_Angle     | No_Angle     | 0.1  | 0.03  | 1OPS |
| GLN | 3  | A | -86.38  | 147.12 | No_Sec         | 0.0028 | Preferable   | No_Angle     | 1.7  | 0.04  | 1OPS |
| LEU | 10 | A | -66.15  | 131.75 | No_Sec         | 0.0311 | Preferable   | Preferable   | -0.2 | 0.04  | 1OPS |
| MET | 13 | A | -48.98  | 139.87 | Turn           | 0.0031 | Preferable   | Preferable   | -0.7 | -0.37 | 1OPS |
| ALA | 16 | A | -70.04  | 132.98 | B-Bridge       | 0.2644 | Preferable   | Preferable   | -1.1 | -0.12 | 1OPS |
| ALA | 20 | A | -51.59  | -21.91 | 3-<br>10_Helix | 0.0056 | Preferable   | Preferable   | -0.5 | -0.16 | 1OPS |
| GLY | 24 | A | -96.44  | 129.81 | B_Strand       | 0.0251 | Acceptable   | Preferable   | -0.2 | 0.02  | 1OPS |
| VAL | 26 | A | -81.38  | 118.31 | No_Sec         | 0.0120 | Preferable   | Preferable   | 0    | -0.04 | 1OPS |
| ASN | 28 | A | -143.81 | 113.05 | Bend           | 0.0043 | Questionable | Preferable   | 1.7  | -4.34 | 1OPS |
| ILE | 30 | A | -82.59  | 139.98 | No_Sec         | 0.2878 | Preferable   | Preferable   | -0.2 | 0.04  | 1OPS |
| PHE | 34 | A | -57.02  | -24.26 | 3-<br>10_Helix | 0.0037 | Preferable   | Preferable   | 10.2 | -1.55 | 1OPS |
| ALA | 35 | A | -66.59  | -26.2  | 3-<br>10_Helix | 0.0043 | Preferable   | Acceptable   | 0.4  | -0.29 | 1OPS |
| SER | 38 | A | -60.09  | -25.05 | 3-<br>10_Helix | 0.1459 | Preferable   | Preferable   | -1   | -0.01 | 1OPS |
| GLN | 39 | A | -81.16  | -13.92 | 3-<br>10_Helix | 0.0036 | Preferable   | Acceptable   | 1.4  | -1.35 | 1OPS |
| VAL | 41 | A | -59.14  | 125    | Turn           | 0.0044 | Preferable   | Questionable | 1.9  | -0.99 | 1OPS |
| GLN | 44 | A | -99.73  | 153.4  | B-Bridge       | 0.0077 | Preferable   | Preferable   | 1    | -0.26 | 1OPS |
| VAL | 45 | A | -89.32  | 140.4  | B-Bridge       | 0.0033 | Preferable   | Preferable   | 2.9  | -3.52 | 1OPS |
| ASN | 46 | A | -97.72  | 19.69  | Bend           | 0.0049 | Preferable   | Preferable   | 5.8  | -4.44 | 1OPS |
| ALA | 50 | A | -78.5   | 157.25 | No_Sec         | 0.1104 | Preferable   | Preferable   | 1.9  | -0.23 | 1OPS |
| LYS | 51 | A | -68.21  | 132.06 | Turn           | 0.0061 | Preferable   | Preferable   | 0    | 0.01  | 1OPS |
| THR | 54 | A | -85.78  | 128.46 | B-Bridge       | 0.0037 | Preferable   | Preferable   | 0.6  | -0.61 | 1OPS |
| ASN | 58 | A | -73.12  | 1.5    | 3-<br>10_Helix | 0.0046 | Preferable   | Preferable   | -0.1 | -0.39 | 1OPS |
| LYS | 61 | A | -60.65  | 120.73 | Turn           | 0.0040 | Preferable   | Preferable   | 5.3  | -0.78 | 1OPS |
| THR | 62 | A | 67.77   | 19.61  | Turn           | 0.0041 | Questionable | Preferable   | 2.5  | -0.07 | 1OPS |
| ALA | 64 | A | -70.77  | -14.22 | Turn           | 0.0083 | Preferable   | Preferable   | -1.2 | -0.02 | 1OPS |
| GLN | 3  | A | 0       | 0      | No_Sec         | 0.1040 | No_Angle     | No_Angle     | 1.2  | -0.21 | 1ORC |
| ARG | 4  | A | -73.38  | 149.65 | No_Sec         | 0.1876 | Preferable   | No_Angle     | 0.9  | -0.53 | 1ORC |
| ILE | 5  | A | -117.38 | 138.86 | B_Strand       | 0.0033 | Questionable | Preferable   | 4.4  | -2.05 | 1ORC |
| THR | 6  | A | -70.46  | 159.83 | B_Strand       | 0.0686 | Preferable   | Preferable   | -0.2 | 0.24  | 1ORC |
| LEU | 7  | A | -59.34  | -42.16 | A_Helix        | 0.0048 | Preferable   | Preferable   | 4.9  | -3.9  | 1ORC |
| LYS | 8  | A | -62.59  | -43.88 | A_Helix        | 0.0189 | Preferable   | Preferable   | 0.6  | -1.06 | 1ORC |
| ASP | 9  | A | -68.46  | -34.21 | A_Helix        | 0.0038 | Preferable   | Preferable   | 7.3  | -4.26 | 1ORC |
| TYR | 10 | A | -63.57  | -43.12 | A_Helix        | 0.0040 | Preferable   | Preferable   | 8.1  | -3.53 | 1ORC |
| ALA | 11 | A | -64.85  | -37.08 | A_Helix        | 0.0042 | Preferable   | Preferable   | 4    | -4.39 | 1ORC |
| MET | 12 | A | -67.83  | -31.54 | A_Helix        | 0.0040 | Preferable   | Preferable   | 5.7  | -3.91 | 1ORC |
| ARG | 13 | A | -82.89  | -38.64 | A_Helix        | 0.0044 | Acceptable   | Preferable   | 5.8  | -4.12 | 1ORC |
| PHE | 14 | A | -113.44 | -11.36 | A_Helix        | 0.0037 | Questionable | Acceptable   | 6.6  | -4.94 | 1ORC |
| GLY | 15 | A | 95.54   | 154.59 | No_Sec         | 0.0034 | Questionable | Questionable | 10.1 | -3.47 | 1ORC |
| GLN | 16 | A | -68.39  | -31.95 | A_Helix        | 0.0175 | Preferable   | Questionable | 1.2  | 0.03  | 1ORC |
| THR | 17 | A | -66.6   | -51.12 | A_Helix        | 0.0282 | Preferable   | Preferable   | 0.3  | -0.08 | 1ORC |
| LYS | 18 | A | -63.02  | -38.35 | A_Helix        | 0.0203 | Preferable   | Preferable   | 0.7  | -2.59 | 1ORC |
| THR | 19 | A | -57.52  | -49.4  | A_Helix        | 0.0066 | Preferable   | Preferable   | 5.6  | -2.36 | 1ORC |
| ALA | 20 | A | -60.6   | -44.46 | A_Helix        | 0.0039 | Preferable   | Preferable   | 5.4  | -3.48 | 1ORC |
| LYS | 21 | A | -64.24  | -44.7  | A_Helix        | 0.0041 | Preferable   | Preferable   | 6.5  | -3.7  | 1ORC |
| ASP | 22 | A | -62.07  | -29.85 | A_Helix        | 0.0047 | Preferable   | Preferable   | 6.9  | -3.4  | 1ORC |
| LEU | 23 | A | -95.37  | -11.36 | A_Helix        | 0.0038 | Preferable   | Preferable   | 6.2  | -4.11 | 1ORC |
| GLY | 24 | A | 67.56   | 38.87  | Turn           | 0.0044 | Questionable | Questionable | 2.8  | -3.68 | 1ORC |
| VAL | 25 | A | -127.95 | 170.28 | Bend           | 0.0040 | Questionable | Acceptable   | 3    | -2.89 | 1ORC |
| TYR | 26 | A | -94.52  | 163.43 | No_Sec         | 0.0987 | Preferable   | Preferable   | 0.6  | 0.44  | 1ORC |
| GLN | 27 | A | -56.42  | -44.46 | A_Helix        | 0.5145 | Preferable   | Preferable   | 1.1  | 0.28  | 1ORC |
| SER | 28 | A | -53.12  | -40.63 | A_Helix        | 0.1505 | Preferable   | Preferable   | -0.3 | -0.43 | 1ORC |
| ALA | 29 | A | -66.77  | -36.66 | A_Helix        | 0.0042 | Preferable   | Preferable   | 2.8  | -2.78 | 1ORC |
| ILE | 30 | A | -61.84  | -48.58 | A_Helix        | 0.0042 | Preferable   | Preferable   | 3.1  | -3.89 | 1ORC |
| ASN | 31 | A | -63.86  | -36.55 | A_Helix        | 0.0040 | Preferable   | Preferable   | 3.1  | -0.66 | 1ORC |
| LYS | 32 | A | -70.08  | -42.09 | A_Helix        | 0.0032 | Preferable   | Preferable   | 5    | -1.65 | 1ORC |
| ALA | 33 | A | -56.21  | -43.04 | A_Helix        | 0.0025 | Preferable   | Preferable   | 5.5  | -3.25 | 1ORC |
| ILE | 34 | A | -66.44  | -47.73 | A_Helix        | 0.0035 | Preferable   | Preferable   | 6.6  | -3.63 | 1ORC |
| HIS | 35 | A | -51.61  | -46.43 | A_Helix        | 0.0041 | Preferable   | Preferable   | 9.4  | -2.79 | 1ORC |
| ALA | 36 | A | -72.09  | -6.18  | Turn           | 0.0037 | Preferable   | Preferable   | 5.8  | -2.4  | 1ORC |
| GLY | 37 | A | 61.67   | 39.97  | Turn           | 0.0048 | Questionable | Questionable | 2.7  | -1.72 | 1ORC |
| ARG | 38 | A | -73.42  | 152.96 | No_Sec         | 0.0038 | Preferable   | Acceptable   | 4.8  | -3.03 | 1ORC |
| LYS | 39 | A | -95.72  | 91.3   | B_Strand       | 0.0143 | Acceptable   | Preferable   | 0.8  | -0.16 | 1ORC |
| ILE | 40 | A | -120.18 | 130.24 | B_Strand       | 0.0039 | Questionable | Acceptable   | 6.8  | -4.78 | 1ORC |
| LEU | 42 | A | -114.81 | 145.17 | B_Strand       | 0.0042 | Questionable | Preferable   | 6.2  | -5.14 | 1ORC |
| THR | 43 | A | -122.24 | 125.45 | B_Strand       | 0.0045 | Questionable | Preferable   | 3.3  | -4.03 | 1ORC |
| ILE | 44 | A | -94.27  | 129.34 | B_Strand       | 0.0302 | Preferable   | Preferable   | 0.8  | -1.63 | 1ORC |
| ASN | 45 | A | -93.51  | 156.22 | No_Sec         | 0.0054 | Preferable   | Preferable   | 4.2  | -1.55 | 1ORC |
| ALA | 46 | A | -62.69  | -19.9  | Turn           | 0.5815 | Preferable   | Preferable   | -0.8 | 0.18  | 1ORC |
| ASP | 47 | A | -85.91  | 4.19   | Turn           | 0.0034 | Preferable   | Acceptable   | 1    | -2.15 | 1ORC |
| GLY | 48 | A | 93.25   | -14.93 | Bend           | 0.0041 | Questionable | Questionable | 10.1 | -3.94 | 1ORC |
| SER | 49 | A | -78.73  | 161.83 | No_Sec         | 0.0036 | Preferable   | Questionable | 8.9  | -1.83 | 1ORC |
| VAL | 50 | A | -125.63 | 137.02 | B_Strand       | 0.0034 | Questionable | Preferable   | 2.3  | -2.36 | 1ORC |
| TYR | 51 | A | -113.59 | 129.97 | B_Strand       | 0.0051 | Questionable | Preferable   | 4.2  | -4.25 | 1ORC |
| ALA | 52 | A | -121.16 | 144.41 | B_Strand       | 0.0038 | Questionable | Preferable   | 0.1  | -2.58 | 1ORC |
| GLU | 53 | A | -136.64 | 148.22 | B_Strand       | 0.0043 | Questionable | Preferable   | 2.9  | -3.48 | 1ORC |
| GLU | 54 | A | -118.58 | 142.17 | B_Strand       | 0.0055 | Questionable | Preferable   | 6.1  | -3.53 | 1ORC |
| VAL | 55 | A | -104.97 | 120.42 | B_Strand       | 0.0041 | Questionable | Preferable   | 4.2  | -2.51 | 1ORC |

|     |    |   |         |         |          |        |              |              |      |       |      |
|-----|----|---|---------|---------|----------|--------|--------------|--------------|------|-------|------|
| GLU | 56 | A | -107.73 | 157.43  | B_Strand | 0.0053 | Acceptable   | Questionable | 4.6  | -2.26 | 1ORC |
| ASP | 56 | A | 54.33   | 53.95   | Turn     | 0.0051 | Questionable | Preferable   | 4.6  | -0.97 | 1ORC |
| LYS | 56 | A | -147.92 | 128.47  | B_Strand | 0.0050 | Questionable | Preferable   | 4.3  | -0.78 | 1ORC |
| LYS | 56 | A | -127.69 | 161.59  | B_Strand | 0.0045 | Questionable | Preferable   | 10.5 | -2.51 | 1ORC |
| VAL | 56 | A | -109.68 | 106.51  | B_Strand | 0.0042 | Questionable | Preferable   | 1.4  | -2.33 | 1ORC |
| GLY | 56 | A | 71.19   | -13.48  | Turn     | 0.0040 | Questionable | Preferable   | 1.9  | -1.82 | 1ORC |
| PHE | 58 | A | -129.66 | 136.51  | Bend     | 0.0040 | Questionable | Preferable   | 3.4  | -2.23 | 1ORC |
| SER | 60 | A | -81.64  | -51.54  | No_Sec   | 0.1692 | Questionable | Preferable   | -0.4 | -0.12 | 1ORC |
| SER | 1  | A | 0       | 0       | No_Sec   | 0.0252 | No_Angle     | No_Angle     | -0.1 | -0.44 | 1R69 |
| ILE | 2  | A | -62.07  | -34.59  | A_Helix  | 0.0052 | Preferable   | No_Angle     | 2.5  | -1.9  | 1R69 |
| SER | 3  | A | -65.31  | -42.47  | A_Helix  | 0.0128 | Preferable   | Preferable   | -0.3 | -0.91 | 1R69 |
| SER | 4  | A | -73.51  | -38.87  | A_Helix  | 0.0047 | Preferable   | Preferable   | 0.3  | -2.12 | 1R69 |
| ARG | 5  | A | -66.85  | -33.97  | A_Helix  | 0.0015 | Preferable   | Preferable   | 11   | -2.6  | 1R69 |
| VAL | 6  | A | -72.06  | -45.28  | A_Helix  | 0.0033 | Preferable   | Preferable   | 9.3  | -2.8  | 1R69 |
| LYS | 7  | A | -60.63  | -51.09  | A_Helix  | 0.0031 | Preferable   | Preferable   | 5.9  | -3.07 | 1R69 |
| SER | 8  | A | -53.16  | -46.14  | A_Helix  | 0.0043 | Preferable   | Preferable   | 7.1  | -2.86 | 1R69 |
| LYS | 9  | A | -74.27  | -41.55  | A_Helix  | 0.0041 | Preferable   | Preferable   | 5.3  | -3.1  | 1R69 |
| ILE | 11 | A | -64.64  | -42.5   | A_Helix  | 0.0041 | Preferable   | Preferable   | 5.6  | -3.56 | 1R69 |
| GLN | 12 | A | -62.61  | -28.83  | A_Helix  | 0.0039 | Preferable   | Preferable   | 4.4  | -3.14 | 1R69 |
| LEU | 13 | A | -92.18  | -8.39   | Turn     | 0.0038 | Preferable   | Preferable   | 4.7  | -     | 1R69 |
| LEU | 15 | A | -111.26 | 139.69  | No_Sec   | 0.0042 | Questionable | Questionable | 5.8  | -3.99 | 1R69 |
| ASN | 16 | A | -97.44  | 174.77  | No_Sec   | 0.0073 | Preferable   | Preferable   | 6.9  | -1.71 | 1R69 |
| GLN | 17 | A | -61.68  | -36.07  | A_Helix  | 0.0203 | Preferable   | Preferable   | 0.8  | -0.58 | 1R69 |
| ALA | 18 | A | -66.1   | -39.69  | A_Helix  | 0.0207 | Preferable   | Preferable   | -0.2 | -1.65 | 1R69 |
| GLU | 19 | A | -67.93  | -39.56  | A_Helix  | 0.0042 | Preferable   | Preferable   | 6.5  | -3.59 | 1R69 |
| LEU | 20 | A | -68.98  | -39.79  | A_Helix  | 0.0046 | Preferable   | Preferable   | 5.6  | -3.5  | 1R69 |
| ALA | 21 | A | -59.64  | -50.04  | A_Helix  | 0.0035 | Preferable   | Preferable   | 6.7  | -2.93 | 1R69 |
| GLN | 22 | A | -63.8   | -34.52  | A_Helix  | 0.0049 | Preferable   | Preferable   | 4.1  | -3.21 | 1R69 |
| LYS | 23 | A | -70.73  | -37.42  | A_Helix  | 0.0041 | Preferable   | Preferable   | 5.6  | -2.67 | 1R69 |
| VAL | 24 | A | -80.59  | -33.27  | A_Helix  | 0.0037 | Preferable   | Preferable   | 7.4  | -3.78 | 1R69 |
| GLY | 25 | A | 88.48   | 36.64   | Turn     | 0.0037 | Questionable | Acceptable   | 6.5  | -0.85 | 1R69 |
| THR | 26 | A | -124.2  | -173.51 | Bend     | 0.0032 | Questionable | Questionable | 4.2  | -3.34 | 1R69 |
| THR | 27 | A | -87.92  | 157.22  | No_Sec   | 0.0060 | Preferable   | Acceptable   | 4.1  | -1.4  | 1R69 |
| GLN | 28 | A | -62.36  | -42.35  | A_Helix  | 0.1531 | Preferable   | Preferable   | 0.9  | 0.01  | 1R69 |
| GLN | 29 | A | -58.57  | -36.49  | A_Helix  | 0.0905 | Preferable   | Preferable   | 1.3  | -1.1  | 1R69 |
| SER | 30 | A | -65.96  | -38.7   | A_Helix  | 0.0057 | Preferable   | Preferable   | 5.9  | -2.96 | 1R69 |
| ILE | 31 | A | -67.27  | -41.14  | A_Helix  | 0.0041 | Preferable   | Preferable   | 3.3  | -2.83 | 1R69 |
| GLU | 32 | A | -62.61  | -43.96  | A_Helix  | 0.0067 | Preferable   | Preferable   | 5.2  | -3.29 | 1R69 |
| GLN | 33 | A | -66.47  | -33.32  | A_Helix  | 0.0026 | Preferable   | Preferable   | 6.5  | -3.43 | 1R69 |
| LEU | 34 | A | -74.62  | -38.36  | A_Helix  | 0.0051 | Preferable   | Preferable   | 5.9  | -3.13 | 1R69 |
| GLU | 35 | A | -74.94  | -18.04  | A_Helix  | 0.0029 | Preferable   | Preferable   | 7.6  | -2.86 | 1R69 |
| ASN | 36 | A | -102.43 | 11.27   | Turn     | 0.0043 | Preferable   | Acceptable   | 5.8  | -3.29 | 1R69 |
| GLY | 37 | A | 64.17   | 24.16   | Turn     | 0.0042 | Questionable | Questionable | 1.9  | -2.65 | 1R69 |
| LYS | 38 | A | -82.91  | -26.33  | Bend     | 0.0046 | Preferable   | Questionable | 4.4  | -0.92 | 1R69 |
| THR | 39 | A | -132.23 | 127.64  | No_Sec   | 0.0039 | Questionable | Acceptable   | 1.8  | -0.69 | 1R69 |
| LYS | 40 | A | -109.57 | -20.34  | Bend     | 0.0053 | Questionable | Preferable   | 1.5  | 0.13  | 1R69 |
| ARG | 41 | A | -136.03 | 67.89   | Bend     | 0.0048 | Questionable | Questionable | 2.1  | -0.78 | 1R69 |
| ARG | 43 | A | -72.86  | -27.18  | Turn     | 0.1418 | Preferable   | Preferable   | 1.1  | 0.18  | 1R69 |
| PHE | 44 | A | -91.29  | 34.21   | Turn     | 0.0031 | Acceptable   | Acceptable   | 3.7  | -3.08 | 1R69 |
| LEU | 45 | A | -61.47  | -44.92  | A_Helix  | 0.0041 | Preferable   | Questionable | 2.2  | -3.28 | 1R69 |
| GLU | 47 | A | -72.71  | -30.82  | A_Helix  | 0.0131 | Preferable   | Preferable   | 1    | -1.98 | 1R69 |
| LEU | 48 | A | -70.73  | -42.08  | A_Helix  | 0.0045 | Preferable   | Acceptable   | 9.5  | -4.07 | 1R69 |
| ALA | 49 | A | -62.38  | -42.71  | A_Helix  | 0.0034 | Preferable   | Preferable   | 4.8  | -3.86 | 1R69 |
| SER | 50 | A | -66.32  | -43.86  | A_Helix  | 0.0037 | Preferable   | Preferable   | 3.7  | -2.45 | 1R69 |
| ALA | 51 | A | -67.58  | -27.77  | A_Helix  | 0.0044 | Preferable   | Preferable   | 3.8  | -     | 1R69 |
| LEU | 52 | A | -93.94  | -6.56   | Turn     | 0.0044 | Preferable   | Acceptable   | 6.5  | -3.1  | 1R69 |
| VAL | 54 | A | -134.04 | 172.17  | No_Sec   | 0.0037 | Questionable | Acceptable   | 7    | -3.76 | 1R69 |
| SER | 55 | A | -88.85  | 162.46  | No_Sec   | 0.0069 | Preferable   | Preferable   | 0    | -0.68 | 1R69 |
| VAL | 56 | A | -73.69  | -36.51  | A_Helix  | 0.0336 | Preferable   | Preferable   | 0.9  | -0.88 | 1R69 |
| ASP | 57 | A | -56.95  | -52.57  | A_Helix  | 0.0220 | Preferable   | Preferable   | 1.2  | -0.91 | 1R69 |
| TRP | 58 | A | -54.77  | -49.14  | A_Helix  | 0.0033 | Preferable   | Preferable   | 12.6 | -3.66 | 1R69 |
| ASN | 61 | A | -106.44 | -29.57  | A_Helix  | 0.0041 | Questionable | Preferable   | 4.6  | -0.72 | 1R69 |
| GLU | 1  | A | 0       | 0       | No_Sec   | 0.0276 | No_Angle     | No_Angle     | 1.5  | -0.14 | 1TG0 |
| VAL | 4  | A | -60.95  | 148.87  | Bend     | 0.2089 | Preferable   | Preferable   | -0.4 | -0.09 | 1TG0 |
| LYS | 7  | A | -87.52  | 142.99  | B_Strand | 0.0223 | Preferable   | Preferable   | 0.2  | -1.96 | 1TG0 |
| GLN | 11 | A | -88.98  | -22.74  | Bend     | 0.0028 | Preferable   | Preferable   | 5.9  | -3.07 | 1TG0 |
| ASP | 17 | A | -93.31  | 8.4     | Bend     | 0.0113 | Preferable   | Preferable   | 0    | 0.12  | 1TG0 |
| TYR | 18 | A | -102.9  | 127.28  | No_Sec   | 0.0056 | Acceptable   | Questionable | 1.8  | -1.35 | 1TG0 |
| GLU | 19 | A | -59.64  | -40.91  | Turn     | 0.3904 | Preferable   | Preferable   | 0.6  | 0.92  | 1TG0 |
| ASP | 20 | A | -83.41  | -2.14   | Turn     | 0.0050 | Preferable   | Preferable   | 0    | -0.54 | 1TG0 |
| ASP | 21 | A | -76     | 146.45  | B-Bridge | 0.0040 | Preferable   | Questionable | 8.4  | -2.9  | 1TG0 |
| ASN | 23 | A | -118.21 | 156.33  | No_Sec   | 0.0037 | Questionable | Preferable   | 3.3  | -0.86 | 1TG0 |
| GLU | 25 | A | -92.84  | 164.47  | No_Sec   | 0.0354 | Preferable   | Preferable   | 0.1  | -1.15 | 1TG0 |
| LYS | 26 | A | -50.06  | 141.56  | Turn     | 0.0037 | Preferable   | Preferable   | 0    | -2.14 | 1TG0 |
| ASP | 27 | A | 83.53   | -5.97   | Turn     | 0.0039 | Questionable | Preferable   | 4.9  | -2.6  | 1TG0 |
| GLN | 28 | A | -64.55  | 130.34  | No_Sec   | 0.0028 | Preferable   | Questionable | 6.4  | -3.35 | 1TG0 |
| GLU | 29 | A | -84.72  | 134.51  | B_Strand | 0.0089 | Preferable   | Preferable   | 1    | -1.72 | 1TG0 |
| ILE | 30 | A | -132.04 | 142.42  | B_Strand | 0.0035 | Questionable | Preferable   | 5.1  | -3.24 | 1TG0 |
| THR | 33 | A | -112.02 | -10.82  | B_Strand | 0.0038 | Questionable | Preferable   | 2.3  | -2.9  | 1TG0 |
| SER | 34 | A | -153.13 | 148.02  | B_Strand | 0.0032 | Questionable | Questionable | 1.5  | -3.15 | 1TG0 |
| VAL | 35 | A | -101.34 | 111.22  | B_Strand | 0.0040 | Questionable | Preferable   | 1.4  | -2.38 | 1TG0 |
| GLU | 36 | A | -79.58  | -46.43  | No_Sec   | 0.0035 | Acceptable   | Preferable   | 4.3  | 1     | 1TG0 |
| ASP | 37 | A | -165.37 | -164.76 | Bend     | 0.0033 | Questionable | Preferable   | 3.8  | -1.56 | 1TG0 |
| ALA | 38 | A | -66.62  | -22.68  | Bend     | 0.0131 | Preferable   | Questionable | -0.2 | 0.03  | 1TG0 |
| GLU | 39 | A | -102.13 | -31.44  | Bend     | 0.0038 | Questionable | Acceptable   | 2.1  | -1.44 | 1TG0 |
| GLY | 43 | A | -169.57 | -166.47 | B_Strand | 0.0034 | Questionable | Preferable   | 2.9  | -3.16 | 1TG0 |
| GLN | 46 | A | -96.91  | 118.91  | B_Strand | 0.0044 | Acceptable   | Preferable   | 1.9  | -1.21 | 1TG0 |
| ASP | 47 | A | -79.11  | -178.14 | No_Sec   | 0.0038 | Preferable   | Preferable   | 5    | -2.92 | 1TG0 |
| SER | 48 | A | -72.17  | -20.68  | Turn     | 0.0646 | Preferable   | Acceptable   | -0.1 | -0.3  | 1TG0 |
| ASP | 51 | A | -92.24  | 136.89  | No_Sec   | 0.0038 | Preferable   | Questionable | 2.5  | -2.91 | 1TG0 |

|     |    |   |         |         |                |        |              |              |      |       |      |
|-----|----|---|---------|---------|----------------|--------|--------------|--------------|------|-------|------|
| VAL | 52 | A | -79.38  | 127.37  | B_Strand       | 0.0070 | Preferable   | Preferable   | 0.3  | -1.56 | 1TG0 |
| GLU | 54 | A | -137.97 | 159.48  | B_Strand       | 0.0041 | Questionable | Preferable   | 2.1  | -2.56 | 1TG0 |
| GLY | 55 | A | 158.8   | -173.08 | B_Strand       | 0.0037 | Questionable | Preferable   | 8.9  | -3.17 | 1TG0 |
| ILE | 56 | A | -95.59  | 151.12  | B_Strand       | 0.0035 | Preferable   | Questionable | 3.1  | -1.61 | 1TG0 |
| PHE | 57 | A | -160.17 | 158.62  | B_Strand       | 0.0031 | Questionable | Preferable   | 5.4  | -1.99 | 1TG0 |
| LYS | 59 | A | -54.08  | -34.58  | 3-             | 0.0027 | Preferable   | Preferable   | 6    | -1.35 | 1TG0 |
| SER | 60 | A | -63.42  | -18.84  | 10_Helix<br>3- | 0.0047 | Preferable   | Preferable   | -0.2 | -2.56 | 1TG0 |
| ALA | 63 | A | -124.32 | 141.83  | B_Strand       | 0.0038 | Questionable | Preferable   | 5.3  | -3.21 | 1TG0 |
| VAL | 64 | A | -58.92  | 136.62  | B_Strand       | 0.0423 | Preferable   | Preferable   | -0.3 | -0.11 | 1TG0 |
| GLN | 65 | A | -76.69  | 130.2   | No_Sec         | 0.0046 | Preferable   | Preferable   | 8.4  | 0.22  | 1TG0 |
| GLY | 66 | A | 0       | 0       | No_Sec         | 0.0063 | No_Angle     | No_Angle     | 8.5  | 0.05  | 1TG0 |
| ALA | 13 | A | -49.06  | -43.86  | A_Helix        | 0.3280 | Preferable   | Preferable   | -0.3 | 0.23  | 2CJJ |
| LYS | 14 | A | -78.9   | -30.19  | A_Helix        | 0.0056 | Preferable   | Preferable   | 0.6  | -0.29 | 2CJJ |
| ASP | 27 | A | -71.51  | 173.8   | No_Sec         | 0.2034 | Preferable   | Preferable   | 0.1  | 0.31  | 2CJJ |
| LYS | 28 | A | -61.48  | -19.17  | Turn           | 0.1790 | Preferable   | Preferable   | 0    | -0.73 | 2CJJ |
| ASP | 29 | A | -84.27  | -22.64  | Turn           | 0.0066 | Preferable   | Acceptable   | 1.9  | -0.77 | 2CJJ |
| ALA | 35 | A | -71.58  | -36.58  | A_Helix        | 0.0050 | Preferable   | Preferable   | -0.4 | -1.43 | 2CJJ |
| GLU | 42 | A | -55     | 124.31  | Turn           | 0.5146 | Preferable   | Preferable   | 0.1  | 0.92  | 2CJJ |
| GLY | 43 | A | 75.87   | 43.64   | Turn           | 0.0042 | Questionable | Preferable   | 4.2  | -0.75 | 2CJJ |
| VAL | 57 | A | -60.58  | -43.28  | A_Helix        | 0.0038 | Preferable   | Preferable   | 4.9  | -1.16 | 2CJJ |
| GLU | 58 | A | -67.22  | -35.43  | A_Helix        | 0.0042 | Preferable   | Preferable   | 7.1  | -0.41 | 2CJJ |
| ASP | 59 | A | -64.5   | -46.28  | A_Helix        | 0.0042 | Preferable   | Preferable   | 8.5  | -0.4  | 2CJJ |
| ILE | 60 | A | -65.13  | -42.81  | A_Helix        | 0.0043 | Preferable   | Preferable   | 4.1  | 0.1   | 2CJJ |
| LYS | 61 | A | -59.34  | -46.82  | A_Helix        | 0.0061 | Preferable   | Preferable   | 8.2  | -0.3  | 2CJJ |
| TYR | 62 | A | -53.37  | -52.66  | A_Helix        | 0.0051 | Preferable   | Preferable   | 7.6  | -0.1  | 2CJJ |
| ILE | 63 | A | -52.97  | -43.1   | A_Helix        | 0.0043 | Preferable   | Preferable   | 5    | -0.1  | 2CJJ |
| MET | 1  | A | 0       | 0       | No_Sec         | 0.0147 | No_Angle     | No_Angle     | 6.6  | -2.08 | 2HBB |
| LYS | 2  | A | -85.14  | 130.83  | B_Strand       | 0.0049 | Preferable   | No_Angle     | 1.4  | -0.88 | 2HBB |
| ASP | 8  | A | -64.34  | 139.23  | No_Sec         | 0.0089 | Preferable   | Preferable   | 0.3  | -1.63 | 2HBB |
| LYS | 10 | A | -61.24  | 127.92  | Turn           | 0.3172 | Preferable   | Preferable   | -0.2 | 0.68  | 2HBB |
| GLY | 11 | A | 92.92   | -18.06  | Turn           | 0.0038 | Questionable | Preferable   | 9.4  | -2.87 | 2HBB |
| LYS | 15 | A | -46.17  | 124.44  | Turn           | 0.0033 | Preferable   | Preferable   | 5.9  | -1.63 | 2HBB |
| ASN | 20 | A | -87.25  | 140.06  | B_Strand       | 0.0305 | Preferable   | Preferable   | 0.3  | -0.89 | 2HBB |
| ALA | 22 | A | -59.79  | 140.55  | No_Sec         | 0.2716 | Preferable   | Preferable   | -1.4 | 0.52  | 2HBB |
| ASP | 23 | A | -63.36  | -41.51  | A_Helix        | 0.0289 | Preferable   | Preferable   | 0.7  | 0.61  | 2HBB |
| GLY | 24 | A | -66.99  | -31.47  | A_Helix        | 0.0086 | Preferable   | Preferable   | -0.9 | -0.69 | 2HBB |
| TYR | 25 | A | -74.07  | -43.6   | A_Helix        | 0.0038 | Preferable   | Preferable   | 3.2  | -1.35 | 2HBB |
| ALA | 26 | A | -58.11  | -52.49  | Pi_Helix       | 0.0039 | Preferable   | Preferable   | 3.9  | -2.19 | 2HBB |
| ASN | 27 | A | -62.42  | -46.83  | Pi_Helix       | 0.0037 | Preferable   | Preferable   | 7.1  | -1.67 | 2HBB |
| LEU | 30 | A | -58.47  | -53.04  | Pi_Helix       | 0.0041 | Preferable   | Questionable | 5.2  | -3.12 | 2HBB |
| LYS | 32 | A | -58.47  | -38.04  | Turn           | 0.0973 | Preferable   | Preferable   | 0.4  | 0.63  | 2HBB |
| LEU | 35 | A | -91     | -22.64  | Bend           | 0.0026 | Preferable   | Questionable | 6.3  | -3.01 | 2HBB |
| GLU | 38 | A | -64.11  | 138.29  | B_Strand       | 0.1984 | Preferable   | Preferable   | -0.3 | 0.29  | 2HBB |
| ALA | 39 | A | -83.18  | 49.54   | No_Sec         | 0.0037 | Preferable   | Preferable   | 8.1  | -2.59 | 2HBB |
| THR | 40 | A | -85.22  | 155.25  | No_Sec         | 0.0050 | Preferable   | Questionable | 3.5  | -2.02 | 2HBB |
| ALA | 42 | A | -59.58  | -39.84  | A_Helix        | 0.0132 | Preferable   | Preferable   | -0.7 | -1.26 | 2HBB |
| ASN | 43 | A | -73.73  | -36.29  | A_Helix        | 0.0028 | Preferable   | Preferable   | 7.1  | -2.81 | 2HBB |
| LEU | 44 | A | -65.35  | -41.71  | A_Helix        | 0.0034 | Preferable   | Preferable   | 5.8  | -2.71 | 2HBB |
| LYS | 45 | A | -60.51  | -51.45  | A_Helix        | 0.0039 | Preferable   | Preferable   | 5.2  | -1.91 | 2HBB |
| ALA | 46 | A | -60.96  | -41.15  | A_Helix        | 0.0037 | Preferable   | Preferable   | 4.4  | -1.59 | 2HBB |
| LEU | 47 | A | -65.87  | -44.81  | A_Helix        | 0.0036 | Preferable   | Preferable   | 9.5  | -1.74 | 2HBB |
| GLU | 48 | A | -59.78  | -39.28  | A_Helix        | 0.0040 | Preferable   | Preferable   | 6.8  | -0.68 | 2HBB |
| ALA | 1  | A | 0       | 0       | No_Sec         | 0.1076 | No_Angle     | No_Angle     | -0.9 | -0.11 | 2HDZ |
| GLU | 2  | A | -56.54  | -49.76  | A_Helix        | 0.0060 | Preferable   | No_Angle     | 1.4  | 0.69  | 2HDZ |
| GLU | 3  | A | -57.48  | -41.92  | A_Helix        | 0.0485 | Preferable   | Preferable   | 0.2  | -0.76 | 2HDZ |
| ILE | 4  | A | -64.05  | -44.81  | A_Helix        | 0.0066 | Preferable   | Preferable   | 0.9  | -1.98 | 2HDZ |
| GLN | 6  | A | -58.79  | -48.02  | A_Helix        | 0.0029 | Preferable   | Preferable   | 9.4  | -2.11 | 2HDZ |
| GLN | 7  | A | -59.57  | -34.84  | A_Helix        | 0.0045 | Preferable   | Preferable   | 6.9  | -2.52 | 2HDZ |
| SER | 8  | A | -69.92  | -23.37  | A_Helix        | 0.0034 | Preferable   | Preferable   | 6.3  | -3.7  | 2HDZ |
| VAL | 9  | A | -120.23 | -8.3    | A_Helix        | 0.0051 | Questionable | Acceptable   | 4.8  | -2.56 | 2HDZ |
| ILE | 10 | A | -57.88  | -36     | A_Helix        | 0.0039 | Preferable   | Questionable | 4.2  | -3.04 | 2HDZ |
| GLY | 11 | A | -60.5   | -50.1   | A_Helix        | 0.0477 | Preferable   | Preferable   | -0.8 | -0.9  | 2HDZ |
| ASP | 12 | A | -62.19  | -42.53  | A_Helix        | 0.0052 | Preferable   | Preferable   | 0.3  | -1.42 | 2HDZ |
| ALA | 15 | A | -60.02  | -45.96  | A_Helix        | 0.0064 | Preferable   | Preferable   | 5.6  | -1.1  | 2HDZ |
| ARG | 16 | A | -61.53  | -38.25  | A_Helix        | 0.0037 | Preferable   | Preferable   | 8    | -2.96 | 2HDZ |
| LYS | 18 | A | 54.13   | 44.94   | Turn           | 0.0059 | Questionable | Questionable | 2.5  | -0.71 | 2HDZ |
| ASN | 19 | A | 63.85   | 14.3    | Turn           | 0.0037 | Questionable | Acceptable   | 3.2  | -1    | 2HDZ |
| ARG | 21 | A | -61.51  | -33.85  | A_Helix        | 0.0052 | Preferable   | Questionable | 1.5  | -0.43 | 2HDZ |
| VAL | 22 | A | -68.56  | -45.45  | A_Helix        | 0.0168 | Preferable   | Preferable   | 0.4  | -0.61 | 2HDZ |
| LYS | 23 | A | -65.87  | -41.9   | A_Helix        | 0.0037 | Preferable   | Preferable   | 11   | -1.41 | 2HDZ |
| LEU | 25 | A | -60.93  | -45.33  | A_Helix        | 0.0040 | Preferable   | Preferable   | 6.9  | -3.21 | 2HDZ |
| LYS | 26 | A | -61.16  | -43.22  | A_Helix        | 0.0042 | Preferable   | Preferable   | 5.3  | -2.21 | 2HDZ |
| MET | 30 | A | -64.07  | -41.49  | A_Helix        | 0.0050 | Preferable   | Preferable   | 5.5  | -2.57 | 2HDZ |
| THR | 31 | A | -65.57  | -44.74  | A_Helix        | 0.0031 | Preferable   | Preferable   | 7.7  | -2.46 | 2HDZ |
| ASN | 33 | A | -60.47  | -41.83  | A_Helix        | 0.0042 | Preferable   | Preferable   | 6.5  | -2.05 | 2HDZ |
| MET | 35 | A | -67.68  | 138.84  | Bend           | 0.0042 | Preferable   | Questionable | 9.4  | -3.34 | 2HDZ |
| GLU | 36 | A | -67.3   | 154.9   | No_Sec         | 0.1405 | Preferable   | Preferable   | -0.1 | 0.66  | 2HDZ |
| LYS | 37 | A | -54.78  | -36.01  | A_Helix        | 0.3375 | Preferable   | Preferable   | 0    | 0.77  | 2HDZ |
| LYS | 38 | A | -65.52  | -44.1   | A_Helix        | 0.0084 | Preferable   | Preferable   | 0.8  | -0.58 | 2HDZ |
| GLU | 39 | A | -66.74  | -46.8   | A_Helix        | 0.0059 | Preferable   | Preferable   | 1    | -2.32 | 2HDZ |
| LYS | 40 | A | -55.65  | -41.74  | A_Helix        | 0.0036 | Preferable   | Preferable   | 6.8  | -3.35 | 2HDZ |
| LEU | 41 | A | -61     | -38.58  | A_Helix        | 0.0046 | Preferable   | Preferable   | 8.2  | -2.32 | 2HDZ |
| MET | 42 | A | -58.89  | -44.77  | A_Helix        | 0.0045 | Preferable   | Preferable   | 3.5  | -0.29 | 2HDZ |
| TRP | 43 | A | -71.76  | -30.12  | A_Helix        | 0.0040 | Preferable   | Preferable   | 4.2  | -1.96 | 2HDZ |
| ILE | 44 | A | -67.57  | -44.59  | A_Helix        | 0.0047 | Preferable   | Acceptable   | 7.5  | -1.92 | 2HDZ |
| LYS | 45 | A | -60.92  | -48.34  | A_Helix        | 0.0046 | Preferable   | Preferable   | 6.9  | -1.23 | 2HDZ |
| LYS | 46 | A | -58.73  | -33.95  | A_Helix        | 0.0043 | Preferable   | Preferable   | 6    | -1.15 | 2HDZ |
| ALA | 48 | A | -94.98  | -14.1   | A_Helix        | 0.0042 | Preferable   | Questionable | 5    | -1.37 | 2HDZ |

|     |      |   |         |         |                      |        |              |              |      |       |      |
|-----|------|---|---------|---------|----------------------|--------|--------------|--------------|------|-------|------|
| GLU | 49   | A | -88.66  | -12.43  | No_Sec               | 0.0046 | Preferable   | Questionable | 4.3  | -0.78 | 2HDZ |
| ASP | 50   | A | 0       | 0       | No_Sec               | 0.0045 | No_Angle     | No_Angle     | 0.4  | -0.48 | 2HDZ |
| ASN | 1267 | A | -75.04  | 176.67  | No_Sec               | 0.0094 | Preferable   | Preferable   | 0.5  | 0.09  | 3DKM |
| LEU | 1268 | A | -70.37  | -26.39  | A_Helix              | 0.1283 | Preferable   | Preferable   | -0.2 | 0.56  | 3DKM |
| TYR | 1269 | A | -64.89  | -46.08  | A_Helix              | 0.0045 | Preferable   | Acceptable   | 2.4  | 0.27  | 3DKM |
| PHE | 1270 | A | -61.08  | -44.92  | A_Helix              | 0.0024 | Preferable   | Preferable   | 7.3  | 0.56  | 3DKM |
| GLN | 1271 | A | -58.77  | -45.6   | A_Helix              | 0.0045 | Preferable   | Preferable   | 5.8  | 0.65  | 3DKM |
| GLY | 1272 | A | -51.12  | -50.62  | A_Helix              | 0.0034 | Preferable   | Preferable   | 7.3  | -0.47 | 3DKM |
| LEU | 1273 | A | -59.12  | -37.62  | A_Helix              | 0.0030 | Preferable   | Preferable   | 5.1  | -1.01 | 3DKM |
| LYS | 1274 | A | -78.87  | -34.68  | A_Helix              | 0.0027 | Preferable   | Preferable   | 7    | -0.36 | 3DKM |
| TYR | 1275 | A | -107.06 | -20.16  | A_Helix              | 0.0038 | Questionable | Acceptable   | 8.6  | -1.18 | 3DKM |
| MET | 1276 | A | -88.9   | 79.5    | No_Sec               | 0.0025 | Preferable   | Questionable | 8.3  | -1.9  | 3DKM |
| VAL | 1277 | A | -133.89 | 156.14  | Bend                 | 0.0035 | Questionable | Questionable | 7.4  | -1.34 | 3DKM |
| GLY | 1279 | A | 97.71   | -16.4   | Turn                 | 0.0037 | Questionable | Preferable   | 11.4 | -1.98 | 3DKM |
| ALA | 1280 | A | -63.19  | 137.02  | No_Sec               | 0.0034 | Preferable   | Questionable | 5.5  | -3.34 | 3DKM |
| VAL | 1282 | A | -138.12 | 158.29  | B_Strand             | 0.0036 | Questionable | Preferable   | 3.2  | -2.74 | 3DKM |
| THR | 1283 | A | -123.71 | 176.57  | B_Strand             | 0.0039 | Questionable | Preferable   | 3    | -2.67 | 3DKM |
| ARG | 1284 | A | -60.89  | 157.53  | B_Strand             | 0.0325 | Preferable   | Preferable   | 3    | -1.08 | 3DKM |
| GLY | 1285 | A | -135.06 | -161.97 | No_Sec               | 0.0035 | Questionable | Preferable   | 23.8 | -2.25 | 3DKM |
| LEU | 1286 | A | -55.7   | -47.1   | Turn                 | 0.3280 | Preferable   | Questionable | -0.4 | 0.24  | 3DKM |
| ASP | 1287 | A | -93.45  | 5.73    | Turn                 | 0.0032 | Preferable   | Preferable   | 5.4  | -1.94 | 3DKM |
| TRP | 1288 | A | -47.07  | 128.01  | No_Sec               | 0.0030 | Preferable   | Questionable | 12   | -2.08 | 3DKM |
| LYS | 1289 | A | -136.31 | 31.52   | No_Sec               | 0.0026 | Questionable | Preferable   | 3.4  | -0.71 | 3DKM |
| TRP | 1290 | A | -112.66 | 34.52   | No_Sec               | 0.0039 | Questionable | Questionable | 5.6  | -1.14 | 3DKM |
| ARG | 1291 | A | 54.02   | -135.04 | Turn                 | 0.0035 | Questionable | Questionable | 1.8  | -0.56 | 3DKM |
| ASP | 1292 | A | -98.03  | 31.43   | Turn                 | 0.0105 | Acceptable   | Questionable | 2.3  | -1.56 | 3DKM |
| GLN | 1293 | A | -68.98  | -16.25  | Turn                 | 0.0048 | Preferable   | Questionable | 4.7  | -1.39 | 3DKM |
| ASP | 1294 | A | -71.87  | -9.46   | Turn                 | 0.0125 | Preferable   | Acceptable   | 4.1  | -1.3  | 3DKM |
| GLY | 1295 | A | 88.84   | -23.76  | Bend                 | 0.0032 | Questionable | Questionable | 7.2  | -1.42 | 3DKM |
| SER | 1296 | A | -154.12 | 157.67  | Bend                 | 0.0041 | Questionable | Questionable | 1.3  | -0.54 | 3DKM |
| GLN | 1298 | A | 61.22   | 23.07   | Turn                 | 0.0029 | Questionable | Preferable   | 3.2  | 0.39  | 3DKM |
| GLY | 1299 | A | -61.01  | 150.67  | No_Sec               | 0.0036 | Preferable   | Questionable | 5.4  | -1.53 | 3DKM |
| GLU | 1300 | A | -113.82 | 162.35  | No_Sec               | 0.0023 | Questionable | Preferable   | 1.9  | 0.15  | 3DKM |
| THR | 1302 | A | -124.89 | 135.24  | B_Strand             | 0.0045 | Questionable | Preferable   | 3.8  | -3.06 | 3DKM |
| GLU | 1306 | A | -101.59 | 163.51  | No_Sec               | 0.0067 | Questionable | Questionable | 1.1  | 0.01  | 3DKM |
| LEU | 1307 | A | -59.15  | 141.73  | No_Sec               | 0.0067 | Preferable   | Preferable   | 0.9  | -0.74 | 3DKM |
| HIS | 1308 | A | -140.49 | 114.15  | B-Bridge             | 0.0032 | Questionable | Preferable   | 3.8  | -2.36 | 3DKM |
| ASN | 1309 | A | 52.02   | 32.05   | Turn                 | 0.0036 | Questionable | Preferable   | 3    | -2.36 | 3DKM |
| ASP | 1313 | A | -88.88  | 139.13  | B_Strand             | 0.0221 | Preferable   | Preferable   | 0.8  | 0.06  | 3DKM |
| ALA | 1318 | A | -69.28  | -15.9   | Turn                 | 0.0044 | Preferable   | Preferable   | -1.2 | -3.14 | 3DKM |
| GLY | 1320 | A | -79.42  | 148.67  | No_Sec               | 0.0050 | Preferable   | Questionable | -2   | -1.08 | 3DKM |
| SER | 1321 | A | -118.02 | 132.53  | B_Strand             | 0.0036 | Questionable | Preferable   | 1.3  | -2.34 | 3DKM |
| ASN | 1322 | A | -159.14 | -173.92 | B_Strand             | 0.0032 | Questionable | Preferable   | 2.8  | -2.8  | 3DKM |
| SER | 1323 | A | -123.82 | 145.23  | B_Strand             | 0.0029 | Questionable | Acceptable   | 4.5  | -1.47 | 3DKM |
| ARG | 1325 | A | -80.76  | 131.47  | B_Strand             | 0.0301 | Preferable   | Preferable   | 11.5 | -3.24 | 3DKM |
| ALA | 1328 | A | -57.51  | 141.34  | 3-                   | 0.0033 | Preferable   | Questionable | 4.5  | -2.86 | 3DKM |
| LYS | 1331 | A | -119.26 | 150.84  | 10_Helix<br>No_Sec   | 0.0018 | Questionable | Questionable | 8.1  | -3.4  | 3DKM |
| ASP | 1333 | A | -91.23  | -9.52   | No_Sec               | 0.0033 | Preferable   | Preferable   | 11.3 | -3.06 | 3DKM |
| LEU | 1334 | A | -123.35 | 161.43  | B_Strand             | 0.0038 | Questionable | Questionable | 3.7  | -3.16 | 3DKM |
| LEU | 1336 | A | -61.35  | 141.63  | B_Strand             | 0.0534 | Preferable   | Preferable   | 1.2  | -0.57 | 3DKM |
| ALA | 1337 | A | -71.07  | 157.03  | Poly_Proli<br>ne     | 0.0038 | Preferable   | Preferable   | 6.4  | -1.6  | 3DKM |
| ASP | 1227 | A | -91.34  | 27.32   | No_Sec               | 0.0321 | Acceptable   | No_Angle     | 1.6  | -0.19 | 3L1X |
| ALA | 1228 | A | -61.43  | 134.74  | No_Sec               | 0.0040 | Preferable   | Questionable | 2.9  | 0.34  | 3L1X |
| ASP | 1230 | A | -51.84  | -39.17  | 3-                   | 0.1221 | Preferable   | Preferable   | -0.1 | 0.86  | 3L1X |
| GLU | 1231 | A | -61.36  | -18.04  | 10_Helix<br>3-       | 0.0045 | Preferable   | Preferable   | 0.7  | -0.85 | 3L1X |
| ARG | 1233 | A | -99.88  | 147.49  | 10_Helix<br>B-Bridge | 0.0038 | Acceptable   | Questionable | 7.4  | -3.01 | 3L1X |
| ASP | 1234 | A | -69.56  | 131.13  | No_Sec               | 0.0028 | Preferable   | Preferable   | 10.2 | -3.39 | 3L1X |
| ASP | 1238 | A | 50.81   | 22.57   | No_Sec               | 0.0046 | Questionable | Questionable | 2.2  | -2.73 | 3L1X |
| LEU | 1240 | A | -63.64  | 127.63  | B-Bridge             | 0.0072 | Preferable   | Preferable   | 1.2  | -1.92 | 3L1X |
| THR | 1242 | A | -113.77 | -12.55  | Bend                 | 0.0043 | Questionable | Preferable   | 2    | -2.33 | 3L1X |
| THR | 1251 | A | -69.72  | 134.42  | No_Sec               | 0.0047 | Questionable | Questionable | 4.5  | -1.5  | 3L1X |
| SER | 1256 | A | -55.82  | -47.97  | A_Helix              | 0.0160 | Preferable   | Preferable   | -0.3 | -0.33 | 3L1X |
| THR | 1267 | A | -141.99 | 160.92  | B-Bridge             | 0.0045 | Questionable | Questionable | 9.3  | -2.9  | 3L1X |
| ASP | 1268 | A | -71.39  | 125.35  | No_Sec               | 0.0066 | Preferable   | Preferable   | 7.4  | -3.4  | 3L1X |
| ARG | 1272 | A | 75.18   | 1.11    | No_Sec               | 0.0050 | Questionable | Questionable | 3.7  | -1.85 | 3L1X |
| GLN | 1273 | A | -65.99  | 155.22  | No_Sec               | 0.0051 | Preferable   | Questionable | 8.2  | -3.06 | 3L1X |
| THR | 1274 | A | -66.76  | 141.3   | B-Bridge             | 0.4049 | Preferable   | Preferable   | -0.6 | 0.94  | 3L1X |
| GLU | 1277 | A | -50.17  | -46.03  | 3-                   | 0.3615 | Preferable   | Preferable   | 1.2  | 0.05  | 3L1X |
| SER | 1278 | A | -54.94  | -21.47  | 10_Helix<br>3-       | 0.0186 | Preferable   | Preferable   | -0.4 | -1.17 | 3L1X |
| VAL | 1283 | A | -113    | 80.58   | 10_Helix<br>No_Sec   | 0.0055 | Questionable | Preferable   | 4.9  | -3.34 | 3L1X |
| GLU | 1285 | A | -59.3   | -46.17  | A_Helix              | 0.0305 | Preferable   | Preferable   | 1.1  | -1.9  | 3L1X |
| GLN | 1291 | A | -59.16  | -41.11  | A_Helix              | 0.0040 | Preferable   | Preferable   | 6.9  | -2.28 | 3L1X |
| MET | 1294 | A | -74.44  | -48.75  | A_Helix              | 0.0035 | Acceptable   | Preferable   | 8.3  | -2.61 | 3L1X |
| ARG | 1295 | A | -60.97  | -25.72  | A_Helix              | 0.0042 | Preferable   | Preferable   | 7    | -1.68 | 3L1X |
| GLY | 1    | A | -80.95  | 1.57    | Turn                 | 0.0054 | Preferable   | Questionable | 0    | -0.58 | 3V1A |
| SER | 2    | A | -65.84  | 136.53  | Bend                 | 0.0059 | Preferable   | Questionable | 0.1  | -0.71 | 3V1A |
| LEU | 4    | A | -58.07  | -41.6   | A_Helix              | 0.0040 | Preferable   | Preferable   | 3.6  | -1.9  | 3V1A |
| ALA | 5    | A | -58.27  | -41.64  | A_Helix              | 0.0033 | Preferable   | Preferable   | 3.9  | -1.19 | 3V1A |
| GLN | 6    | A | -69.16  | -35.31  | A_Helix              | 0.0043 | Preferable   | Preferable   | 3    | -1.87 | 3V1A |
| GLN | 7    | A | -58.67  | -41.65  | A_Helix              | 0.0031 | Preferable   | Preferable   | 6.6  | -2.3  | 3V1A |
| ILE | 8    | A | -60.49  | -47.42  | A_Helix              | 0.0048 | Preferable   | Preferable   | 6.5  | -3.33 | 3V1A |
| LYS | 9    | A | -56.37  | -39.44  | A_Helix              | 0.0031 | Preferable   | Preferable   | 3.3  | -2.64 | 3V1A |
| ASN | 10   | A | -64.18  | -41.43  | A_Helix              | 0.0038 | Preferable   | Preferable   | 7.7  | -2.54 | 3V1A |
| ILE | 11   | A | -61.58  | -44.53  | A_Helix              | 0.0035 | Preferable   | Preferable   | 6.4  | -3.28 | 3V1A |
| HIS | 12   | A | -54.6   | -44.39  | A_Helix              | 0.0037 | Preferable   | Preferable   | 4.7  | -2.85 | 3V1A |
| SER | 13   | A | -61.18  | -44.78  | A_Helix              | 0.0039 | Preferable   | Preferable   | 5.2  | -2.37 | 3V1A |



|     |     |   |         |         |                |        |              |              |      |       |      |
|-----|-----|---|---------|---------|----------------|--------|--------------|--------------|------|-------|------|
| PHE | 14  | A | -62.22  | -36.34  | A_Helix        | 0.0036 | Preferable   | Preferable   | 4.5  | -3.73 | 3V1A |
| HIS | 16  | A | -59.35  | -46.76  | A_Helix        | 0.0040 | Preferable   | Preferable   | 4.8  | -2.74 | 3V1A |
| GLN | 17  | A | -62.88  | -36.59  | A_Helix        | 0.0040 | Preferable   | Preferable   | 6.6  | -2.8  | 3V1A |
| ALA | 18  | A | -70.07  | -40.7   | A_Helix        | 0.0040 | Preferable   | Preferable   | 6    | -3.09 | 3V1A |
| LYS | 19  | A | -59.08  | -38.89  | A_Helix        | 0.0038 | Preferable   | Preferable   | 7.7  | -2.7  | 3V1A |
| ALA | 20  | A | -61.92  | -20.03  | Turn           | 0.0036 | Preferable   | Preferable   | 5.3  | -2.56 | 3V1A |
| ALA | 21  | A | -107.05 | 7.09    | Turn           | 0.0044 | Acceptable   | Acceptable   | 0    | -2.6  | 3V1A |
| GLY | 22  | A | 73.69   | 19.87   | Turn           | 0.0040 | Questionable | Questionable | 3.9  | -2.64 | 3V1A |
| ARG | 23  | A | -83.22  | 70.93   | No_Sec         | 0.0046 | Preferable   | Questionable | 5.2  | -2.61 | 3V1A |
| MET | 24  | A | -69.31  | -37.96  | A_Helix        | 0.0062 | Preferable   | Questionable | 4.3  | -1.31 | 3V1A |
| ASP | 25  | A | -57.9   | -47.07  | A_Helix        | 0.0109 | Preferable   | Preferable   | 0.3  | -1.88 | 3V1A |
| GLU | 26  | A | -67.68  | -39.94  | A_Helix        | 0.0040 | Preferable   | Preferable   | 0.6  | -2.32 | 3V1A |
| VAL | 27  | A | -56.21  | -47.51  | A_Helix        | 0.0043 | Preferable   | Preferable   | 7.4  | -2.67 | 3V1A |
| ARG | 28  | A | -62.94  | -39.58  | A_Helix        | 0.0038 | Preferable   | Preferable   | 6.5  | -1.93 | 3V1A |
| THR | 29  | A | -65.19  | -47.15  | A_Helix        | 0.0036 | Preferable   | Preferable   | 3.2  | -2.02 | 3V1A |
| LEU | 30  | A | -62.86  | -32.66  | A_Helix        | 0.0053 | Preferable   | Preferable   | 7.3  | -3.07 | 3V1A |
| GLN | 31  | A | -59.32  | -43.45  | A_Helix        | 0.0036 | Preferable   | Preferable   | 8.8  | -2.6  | 3V1A |
| GLU | 32  | A | -60.22  | -45.52  | A_Helix        | 0.0040 | Preferable   | Preferable   | 3.1  | -2.47 | 3V1A |
| ASN | 33  | A | -61.88  | -43.6   | A_Helix        | 0.0036 | Preferable   | Preferable   | 4    | -2.3  | 3V1A |
| LEU | 34  | A | -52.87  | -52.97  | A_Helix        | 0.0049 | Preferable   | Preferable   | 11.7 | -3.93 | 3V1A |
| HIS | 35  | A | -64.94  | -35.84  | A_Helix        | 0.0040 | Preferable   | Preferable   | 5.9  | -2.96 | 3V1A |
| GLN | 36  | A | -64.04  | -43.88  | A_Helix        | 0.0040 | Preferable   | Preferable   | 7.6  | -2.3  | 3V1A |
| LEU | 37  | A | -68.61  | -37.11  | A_Helix        | 0.0039 | Preferable   | Preferable   | 5.2  | -3.89 | 3V1A |
| MET | 38  | A | -59.4   | -43.31  | A_Helix        | 0.0028 | Preferable   | Preferable   | 8.1  | -3.54 | 3V1A |
| HIS | 39  | A | -68.49  | -37.12  | A_Helix        | 0.0040 | Preferable   | Preferable   | 5.8  | -2.5  | 3V1A |
| GLU | 40  | A | -58.85  | -48.44  | A_Helix        | 0.0033 | Preferable   | Preferable   | 5.5  | -1.95 | 3V1A |
| TYR | 41  | A | -58.6   | -47.28  | A_Helix        | 0.0036 | Preferable   | Preferable   | 9.4  | -2.2  | 3V1A |
| PHE | 42  | A | -82.6   | -12.01  | A_Helix        | 0.0042 | Preferable   | Preferable   | 5.5  | -1.95 | 3V1A |
| GLN | 43  | A | -90.99  | -42.71  | A_Helix        | 0.0031 | Questionable | Questionable | 7.9  | -1.21 | 3V1A |
| GLN | 44  | A | -82.36  | 127.02  | Bend           | 0.0029 | Preferable   | Acceptable   | 7.2  | -1.13 | 3V1A |
| PHE | 876 | A | -82.88  | -21.66  | A_Helix        | 0.0144 | Preferable   | Preferable   | 4.4  | -0.32 | 5JRT |
| SER | 877 | A | -64.56  | -37.26  | A_Helix        | 0.0079 | Preferable   | Acceptable   | -0.1 | -0.56 | 5JRT |
| ILE | 878 | A | -66.27  | -39.53  | A_Helix        | 0.0042 | Preferable   | Preferable   | 3.9  | -2.15 | 5JRT |
| THR | 879 | A | -57.33  | -45.86  | A_Helix        | 0.0037 | Preferable   | Preferable   | 7.8  | -0.82 | 5JRT |
| GLN | 880 | A | -62.64  | -45.13  | A_Helix        | 0.0044 | Preferable   | Preferable   | 7.2  | -1.66 | 5JRT |
| PHE | 881 | A | -60.95  | -45.96  | A_Helix        | 0.0040 | Preferable   | Preferable   | 7.3  | -3.52 | 5JRT |
| VAL | 882 | A | -71.39  | -39.37  | A_Helix        | 0.0042 | Preferable   | Preferable   | 5.8  | -3.31 | 5JRT |
| ARG | 883 | A | -60.53  | -40.1   | A_Helix        | 0.0040 | Preferable   | Preferable   | 3    | -3.01 | 5JRT |
| ASN | 884 | A | -62.46  | -30.43  | A_Helix        | 0.0037 | Preferable   | Preferable   | 2.7  | -1.98 | 5JRT |
| LEU | 885 | A | -82.94  | -4.28   | Turn           | 0.0038 | Preferable   | Preferable   | 6.3  | -3.18 | 5JRT |
| GLY | 886 | A | 68.73   | 28.71   | Turn           | 0.0040 | Questionable | Questionable | -0.1 | -2.42 | 5JRT |
| LEU | 887 | A | -112.47 | 28      | No_Sec         | 0.0039 | Questionable | Questionable | 0.3  | -2.54 | 5JRT |
| GLU | 888 | A | -57.01  | -24.07  | 3-<br>10_Helix | 0.0050 | Preferable   | Questionable | 7    | -0.46 | 5JRT |
| HIS | 889 | A | -63.15  | -20.39  | 3-<br>10_Helix | 0.0050 | Preferable   | Acceptable   | 9.6  | -0.8  | 5JRT |
| LEU | 890 | A | -86.18  | -6.9    | 3-<br>10_Helix | 0.0026 | Preferable   | Acceptable   | 0.4  | -3.61 | 5JRT |
| MET | 891 | A | -58.82  | -29.11  | A_Helix        | 0.0042 | Preferable   | Questionable | 6.5  | -2.57 | 5JRT |
| ASP | 892 | A | -60.29  | -37.23  | A_Helix        | 0.7525 | Preferable   | Preferable   | 4.9  | 0.42  | 5JRT |
| ILE | 893 | A | -71.72  | -51.33  | A_Helix        | 0.0041 | Acceptable   | Preferable   | 8.1  | -2.56 | 5JRT |
| PHE | 894 | A | -57.85  | -39.64  | A_Helix        | 0.0029 | Preferable   | Preferable   | 6.3  | -2.71 | 5JRT |
| GLU | 895 | A | -67.39  | -48.14  | A_Helix        | 0.0040 | Preferable   | Preferable   | 6.8  | -2    | 5JRT |
| ARG | 896 | A | -61.5   | -34.29  | A_Helix        | 0.0033 | Preferable   | Preferable   | 2.9  | -1.67 | 5JRT |
| GLU | 897 | A | -89.01  | 1.18    | Turn           | 0.0036 | Preferable   | Preferable   | 7.2  | -1.81 | 5JRT |
| GLN | 898 | A | 56.24   | 44.35   | Turn           | 0.0037 | Questionable | Questionable | 0.3  | -1.43 | 5JRT |
| ILE | 899 | A | -88.17  | 121.81  | No_Sec         | 0.0040 | Preferable   | Acceptable   | 9.1  | -1.93 | 5JRT |
| THR | 900 | A | -97.6   | 167.84  | No_Sec         | 0.0042 | Preferable   | Preferable   | 0.5  | -1.41 | 5JRT |
| LEU | 901 | A | -61.23  | -40.44  | A_Helix        | 0.0042 | Preferable   | Preferable   | 5.4  | -1.71 | 5JRT |
| ARG | 902 | A | -59.65  | -37.76  | A_Helix        | 0.0072 | Preferable   | Preferable   | 7.3  | -0.27 | 5JRT |
| VAL | 903 | A | -72.01  | -46.02  | A_Helix        | 0.0049 | Preferable   | Preferable   | 5    | -2.41 | 5JRT |
| LEU | 904 | A | -53.89  | -38.61  | A_Helix        | 0.0043 | Preferable   | Preferable   | 0.9  | -3.1  | 5JRT |
| VAL | 905 | A | -55.51  | -31.11  | Turn           | 0.0049 | Preferable   | Preferable   | 7.2  | -1.43 | 5JRT |
| GLU | 906 | A | -93.19  | 2.23    | Turn           | 0.0038 | Preferable   | Preferable   | 1.7  | -0.54 | 5JRT |
| MET | 907 | A | -93     | 128.13  | No_Sec         | 0.0032 | Preferable   | Questionable | 3    | -2.61 | 5JRT |
| GLY | 908 | A | -106.44 | -167.18 | No_Sec         | 0.0032 | Questionable | Preferable   | 0.6  | -2.43 | 5JRT |
| HIS | 909 | A | -54.74  | -43.58  | A_Helix        | 0.0346 | Preferable   | Questionable | 1.8  | -1.83 | 5JRT |
| LYS | 910 | A | -57.07  | -51.98  | A_Helix        | 0.0203 | Preferable   | Preferable   | 8.7  | -0.48 | 5JRT |
| GLU | 911 | A | -66.76  | -41.64  | A_Helix        | 0.0083 | Preferable   | Preferable   | 7.9  | -2.07 | 5JRT |
| LEU | 912 | A | -69.74  | -37.79  | A_Helix        | 0.0043 | Preferable   | Preferable   | 6.9  | -2.76 | 5JRT |
| LYS | 913 | A | -64.63  | -36.62  | A_Helix        | 0.0044 | Preferable   | Preferable   | 2.6  | -2.42 | 5JRT |
| GLU | 914 | A | -57.18  | -39.65  | A_Helix        | 0.0037 | Preferable   | Preferable   | 9.1  | -2.67 | 5JRT |
| ILE | 915 | A | -88.13  | 2.89    | Turn           | 0.0028 | Preferable   | Preferable   | 4.7  | -3.07 | 5JRT |
| GLY | 916 | A | 97.1    | 19.51   | Turn           | 0.0035 | Questionable | Questionable | 2.1  | -2.68 | 5JRT |
| ILE | 917 | A | -88.56  | 86.95   | No_Sec         | 0.0036 | Acceptable   | Questionable | -0.8 | -2.08 | 5JRT |
| ASN | 918 | A | -74.09  | -28.89  | No_Sec         | 0.0037 | Preferable   | Acceptable   | 0.4  | -0.72 | 5JRT |
| ALA | 919 | A | -87.52  | 124.8   | No_Sec         | 0.0040 | Preferable   | Acceptable   | -1.2 | -0.75 | 5JRT |
| TYR | 920 | A | -53.43  | -43.39  | A_Helix        | 0.0779 | Preferable   | Preferable   | 2.3  | -0.45 | 5JRT |
| GLY | 921 | A | -61.42  | -35.27  | A_Helix        | 0.0052 | Preferable   | Preferable   | 9.4  | -0.18 | 5JRT |
| HIS | 922 | A | -70.35  | -40.99  | A_Helix        | 0.0039 | Preferable   | Preferable   | 7.7  | -0.53 | 5JRT |
| ARG | 923 | A | -65.52  | -42.26  | A_Helix        | 0.0053 | Preferable   | Preferable   | 7.7  | -2.22 | 5JRT |
| GLU | 924 | A | -61.87  | -39.31  | A_Helix        | 0.0042 | Preferable   | Preferable   | 7.8  | -2.48 | 5JRT |
| LYS | 925 | A | -62.84  | -40     | A_Helix        | 0.0028 | Preferable   | Preferable   | 8.1  | -2.52 | 5JRT |
| LEU | 926 | A | -69.88  | -49.45  | A_Helix        | 0.0038 | Preferable   | Preferable   | 8.2  | -2.96 | 5JRT |
| ILE | 927 | A | -61.35  | -44.46  | A_Helix        | 0.0038 | Preferable   | Preferable   | 11.6 | -2.44 | 5JRT |
| LYS | 928 | A | -71.55  | -30.4   | A_Helix        | 0.0039 | Preferable   | Preferable   | 7.1  | -2.45 | 5JRT |
| GLY | 929 | A | -63.77  | -39.25  | A_Helix        | 0.0038 | Preferable   | Acceptable   | 5.2  | -2.72 | 5JRT |
| VAL | 930 | A | -68.98  | -46.02  | A_Helix        | 0.0050 | Preferable   | Preferable   | 7.4  | -2.81 | 5JRT |
| GLU | 931 | A | -55.94  | -43.98  | A_Helix        | 0.0037 | Preferable   | Preferable   | 7.9  | -1.83 | 5JRT |
| ARG | 932 | A | -72.18  | -35.18  | A_Helix        | 0.0041 | Preferable   | Preferable   | 7.1  | -1.81 | 5JRT |
| LEU | 933 | A | -62.28  | -43.2   | A_Helix        | 0.0036 | Preferable   | Preferable   | 7.8  | -2.43 | 5JRT |

|     |     |   |         |        |         |        |              |              |      |       |      |
|-----|-----|---|---------|--------|---------|--------|--------------|--------------|------|-------|------|
| ILE | 934 | A | -68.6   | -50.74 | A_Helix | 0.0040 | Preferable   | Preferable   | 9.1  | -0.96 | 5JRT |
| GLY | 8   | A | -62.87  | -42.97 | A_Helix | 0.0714 | Preferable   | Preferable   | 10.1 | 0.9   | 5Z2S |
| ARG | 22  | A | -75.16  | -19.83 | Bend    | 0.5362 | Preferable   | Preferable   | -1.1 | 0.58  | 5Z2S |
| GLY | 25  | A | -75.75  | 177.79 | No_Sec  | 0.0051 | Preferable   | Preferable   | -0.3 | -0.7  | 5Z2S |
| ILE | 26  | A | -62.02  | -38.06 | A_Helix | 0.0532 | Preferable   | Preferable   | -0.4 | 0.25  | 5Z2S |
| ALA | 27  | A | -64.12  | -42.47 | A_Helix | 0.0243 | Preferable   | Preferable   | 10.4 | -1.41 | 5Z2S |
| GLU | 40  | A | -56.13  | -40.06 | A_Helix | 0.0171 | Preferable   | Preferable   | 3.4  | -0.45 | 5Z2S |
| SER | 41  | A | -62.04  | -32.74 | A_Helix | 0.0126 | Preferable   | Preferable   | 6.5  | -0.35 | 5Z2S |
| ARG | 339 | A | -52.24  | -35.51 | Turn    | 0.1257 | Preferable   | Preferable   | 0.8  | 0.1   | 7JJK |
| MET | 341 | A | -65.16  | -38.75 | A_Helix | 0.0035 | Preferable   | Preferable   | 8.3  | -0.01 | 7JJK |
| ASN | 342 | A | -68.74  | -37.75 | A_Helix | 0.0137 | Preferable   | Preferable   | 0.3  | -1.36 | 7JJK |
| ALA | 343 | A | -66.59  | -44.22 | A_Helix | 0.0043 | Preferable   | Preferable   | 0    | -0.92 | 7JJK |
| MET | 345 | A | -66.1   | -30.84 | A_Helix | 0.0034 | Preferable   | Preferable   | 7.4  | -2.09 | 7JJK |
| ARG | 349 | A | -59.18  | -36.06 | A_Helix | 0.0038 | Preferable   | Preferable   | 7.2  | -2.07 | 7JJK |
| ALA | 354 | A | -71.69  | -35.02 | A_Helix | 0.0041 | Preferable   | Preferable   | -0.8 | -1.11 | 7JJK |
| LEU | 355 | A | -64.9   | -43.54 | A_Helix | 0.0044 | Preferable   | Preferable   | 5.2  | -3.3  | 7JJK |
| ALA | 356 | A | -59.29  | -42.33 | A_Helix | 0.0033 | Preferable   | Preferable   | 5.8  | -2.37 | 7JJK |
| LYS | 357 | A | -71.36  | -32.22 | A_Helix | 0.0040 | Preferable   | Preferable   | 4.7  | -2.22 | 7JJK |
| ALA | 358 | A | -77.45  | -22.02 | A_Helix | 0.0037 | Preferable   | Preferable   | 5.9  | -2.12 | 7JJK |
| ASN | 359 | A | -126.79 | 63.41  | Bend    | 0.0034 | Questionable | Acceptable   | 5.6  | -2.91 | 7JJK |
| ALA | 361 | A | -77.91  | -13.74 | Turn    | 0.0041 | Preferable   | Questionable | -0.9 | -1.51 | 7JJK |
| ALA | 362 | A | -88.74  | 140.13 | Bend    | 0.0037 | Preferable   | Questionable | 2    | -1.46 | 7JJK |
| ASN | 363 | A | -83.23  | 175.33 | No_Sec  | 0.0123 | Preferable   | Preferable   | 0.6  | -0.62 | 7JJK |
| ASN | 364 | A | -59.2   | -39.95 | A_Helix | 0.0336 | Preferable   | Preferable   | 0.4  | 0.22  | 7JJK |
| ALA | 365 | A | -63.05  | -40.44 | A_Helix | 0.0290 | Preferable   | Preferable   | -0.2 | -1.3  | 7JJK |
| GLU | 366 | A | -69.51  | -40.6  | A_Helix | 0.0039 | Preferable   | Preferable   | 6.6  | -2.03 | 7JJK |
| SER | 368 | A | -60.98  | -40.11 | A_Helix | 0.0042 | Preferable   | Preferable   | 8.2  | -2.7  | 7JJK |
| VAL | 369 | A | -63.51  | -42.69 | A_Helix | 0.0039 | Preferable   | Preferable   | 3.7  | -3.5  | 7JJK |
| GLY | 372 | A | -63.46  | -40.39 | A_Helix | 0.0040 | Preferable   | Preferable   | 3.9  | -1.94 | 7JJK |
| GLU | 374 | A | -65.14  | -42.86 | A_Helix | 0.0045 | Preferable   | Preferable   | 6.7  | -3.53 | 7JJK |
| ASN | 376 | A | -72.6   | -15.52 | A_Helix | 0.0046 | Preferable   | Preferable   | 6    | -2.18 | 7JJK |
| LYS | 377 | A | -80.91  | -12.78 | A_Helix | 0.0036 | Preferable   | Acceptable   | 3.9  | -3.36 | 7JJK |
| LEU | 378 | A | -69.87  | 144.29 | Bend    | 0.0044 | Preferable   | Questionable | 5.5  | -3.04 | 7JJK |
| SER | 379 | A | -72.64  | 165.6  | No_Sec  | 0.0052 | Preferable   | Preferable   | 5    | -0.63 | 7JJK |
| GLU | 380 | A | -55.74  | -41.95 | A_Helix | 0.1575 | Preferable   | Preferable   | 0.7  | 0.21  | 7JJK |
| GLU | 381 | A | -63.36  | -39.14 | A_Helix | 0.0076 | Preferable   | Preferable   | 0.7  | -0.54 | 7JJK |
| LYS | 384 | A | -51.75  | -49.93 | A_Helix | 0.0027 | Preferable   | Acceptable   | 5    | -3    | 7JJK |
| TYR | 387 | A | -62.76  | -42.77 | A_Helix | 0.0037 | Preferable   | Preferable   | 4.5  | -3.81 | 7JJK |
| ASP | 388 | A | -59.48  | -44.02 | A_Helix | 0.0038 | Preferable   | Preferable   | 7.3  | -1.57 | 7JJK |
| GLU | 389 | A | -67.89  | -38.85 | A_Helix | 0.0031 | Preferable   | Preferable   | 7.5  | -1.85 | 7JJK |
| ALA | 390 | A | -60.26  | -36.02 | A_Helix | 0.0030 | Preferable   | Preferable   | 6    | -1.67 | 7JJK |
| GLN | 391 | A | -68.14  | -39.86 | A_Helix | 0.0039 | Preferable   | Preferable   | 6.8  | -1.51 | 7JJK |
| LYS | 392 | A | -62.82  | -42.06 | A_Helix | 0.0036 | Preferable   | Preferable   | 4.8  | -1    | 7JJK |
| ILE | 393 | A | -60.29  | -44.5  | A_Helix | 0.0045 | Preferable   | Preferable   | 6.3  | -0.93 | 7JJK |
| LYS | 394 | A | -59.04  | -46.83 | A_Helix | 0.0041 | Preferable   | Preferable   | 6.7  | -0.44 | 7JJK |
| GLU | 395 | A | -60.63  | -40.78 | A_Helix | 0.0039 | Preferable   | Preferable   | 6.7  | -0.35 | 7JJK |

**Supplementary Table 2.** Proline stability classification metrics for tested proline angle and score cutoff criteria.

| <b>Score Cutoff</b>               | <b>Backbone Angle<br/>Proline Classification</b> | <b>Precision</b> | <b>Recall</b> | <b>True<br/>Positives</b> | <b>False<br/>Positives</b> | <b>True<br/>Negatives</b> | <b>False<br/>Negatives</b> |
|-----------------------------------|--------------------------------------------------|------------------|---------------|---------------------------|----------------------------|---------------------------|----------------------------|
| -                                 | Preferable                                       | 0.20             | 0.83          | 104                       | 418                        | 108                       | 22                         |
| -                                 | Preferable/Acceptable/<br>No angle               | 0.21             | 0.94          | 118                       | 434                        | 92                        | 8                          |
| ProteinMPNN >= 0.01               | -                                                | 0.64             | 0.56          | 70                        | 40                         | 486                       | 56                         |
| ProteinMPNN >= 0.2                | -                                                | 1.00             | 0.14          | 18                        | 0                          | 526                       | 108                        |
| Rosetta $\Delta\Delta G \leq 0.1$ | -                                                | 0.59             | 0.35          | 44                        | 31                         | 495                       | 82                         |
| ProteinMPNN >= 0.01               | Preferable/Acceptable/<br>No angle               | 0.64             | 0.54          | 68                        | 39                         | 487                       | 58                         |
| Rosetta $\Delta\Delta G \leq 0.1$ | Preferable/Acceptable/<br>No angle               | 0.60             | 0.34          | 43                        | 29                         | 497                       | 83                         |

**Supplementary Table 3.** ProthermDB (2) proline substitutions with Rosetta and ProteinMPNN values from Proscan.

| PDB  | Amino acid | Residue number | Chain | Experimental                |                          |             |                            |
|------|------------|----------------|-------|-----------------------------|--------------------------|-------------|----------------------------|
|      |            |                |       | $\Delta\Delta G$ (kcal/mol) | Rosetta $\Delta\Delta G$ | ProteinMPNN | $-\ln(\text{ProteinMPNN})$ |
| 1c5g | ILE        | 349            | A     | 0.3                         | 4                        | 0.000       | 5.600                      |
| 1g6n | SER        | 128            | A     | 0.14                        | 7.6                      | 0.004       | 5.449                      |
| 1kfw | GLY        | 253            | A     | 2.6                         | 12.1                     | 0.004       | 5.573                      |
| 1kfw | GLY        | 92             | A     | -2.2                        | -1.2                     | 0.061       | 2.805                      |
| 1lz1 | ALA        | 47             | A     | 0.1                         | -0.9                     | 0.052       | 2.962                      |
| 1lz1 | ASP        | 91             | A     | -0.4                        | 0.5                      | 0.018       | 4.034                      |
| 1lz1 | VAL        | 110            | A     | 0.5                         | -0.6                     | 0.434       | 0.835                      |
| 1pga | ALA        | 23             | A     | 0.3                         | -0.4                     | 0.127       | 2.067                      |
| 1pga | ALA        | 24             | A     | 0.5                         | -0.4                     | 0.007       | 4.976                      |
| 1pga | ALA        | 48             | A     | 0.7                         | 1.8                      | 0.005       | 5.339                      |
| 1pga | ASP        | 36             | A     | 3.1                         | 6.1                      | 0.003       | 5.809                      |
| 1pga | GLY        | 9              | A     | 2.4                         | 0                        | 0.004       | 5.655                      |
| 1pga | LYS        | 10             | A     | 0.2                         | 8.9                      | 0.011       | 4.501                      |
| 1pga | THR        | 25             | A     | 2.8                         | 8.6                      | 0.003       | 5.878                      |
| 1pga | THR        | 2              | A     | 2.7                         | 1                        | 0.003       | 5.952                      |
| 1pga | VAL        | 21             | A     | -0.5                        | -0.6                     | 0.099       | 2.311                      |
| 1pga | VAL        | 29             | A     | 3.5                         | 3.9                      | 0.003       | 5.714                      |
| 1rop | ASP        | 30             | A     | 1.6                         | 2.4                      | 0.004       | 5.547                      |
| 1rtp | ALA        | 21             | 1     | -1.92                       | -1                       | 0.588       | 0.531                      |
| 1rtp | HIS        | 26             | 1     | 1.25                        | 0.3                      | 0.336       | 1.090                      |
| 2lzm | ALA        | 74             | A     | 4.5                         | 7.8                      | 0.005       | 5.360                      |
| 2lzm | ASP        | 72             | A     | 2.7                         | 6.2                      | 0.004       | 5.521                      |
| 2lzm | GLN        | 69             | A     | 2.9                         | 5                        | 0.003       | 5.776                      |
| 2lzm | ALA        | 82             | A     | -0.8                        | -0.8                     | 0.163       | 1.816                      |
| 2lzm | ARG        | 96             | A     | 5.5                         | 11.7                     | 0.003       | 5.745                      |
| 2rn2 | HIS        | 62             | A     | -1.1                        | -0.5                     | 0.290       | 1.239                      |
| 2rn2 | ALA        | 52             | A     | 1.6                         | -0.5                     | 0.004       | 5.627                      |

## References

1. Tsuboyama, K., Dauparas, J., Chen, J., Laine, E., Mohseni Behbahani, Y., Weinstein, J.J., Mangan, N.M., Ovchinnikov, S. and Rocklin, G.J. (2023) Mega-scale experimental analysis of protein folding stability in biology and design. *Nature*, **620**, 434-444.
2. Nikam, R., Kulandaisamy, A., Harini, K., Sharma, D. and Gromiha, M.M. (2021) ProThermDB: thermodynamic database for proteins and mutants revisited after 15 years. *Nucleic Acids Res*, **49**, D420-D424.
